# Supplementary material for: Efficient solid-state photoswitching of methoxyazobenzene in a metal–organic framework for thermal energy storage
Source: Royal Society of Chemistry journal article supplement (doi:10.1039/d2sc00632d), 2022-01-01

## Supporting Information

# Efficient solid-state photoswitching of methoxyazobenzene in a metal-organic framework for thermal energy storage.

Kieran Griffiths<sup>†</sup>, Nathan R. Halcovitch<sup>†</sup>, John M. Griffin<sup>†‡\*</sup>

<sup>†</sup> Department of Chemistry, Lancaster University, Lancaster, LA1 4YB, UK

<sup>‡</sup> Materials Science Institute, Lancaster University, Lancaster, LA1 4YB, UK

### Table of Contents

|                                                                                                                                                                                                                                     |    |
|-------------------------------------------------------------------------------------------------------------------------------------------------------------------------------------------------------------------------------------|----|
| <b>Experimental Details</b> .....                                                                                                                                                                                                   | 4  |
| <b>Synthesis of 1</b> .....                                                                                                                                                                                                         | 4  |
| <b>Loading of 1 with MOAB</b> .....                                                                                                                                                                                                 | 4  |
| <b>Quantification of MOAB loading level by UV-vis spectroscopy</b> .....                                                                                                                                                            | 4  |
| <b>Quantification of loading level by acid digestion and <sup>1</sup>H NMR spectroscopy</b> .....                                                                                                                                   | 4  |
| <b>PSS determination of irradiated 1<math>\supset</math>MOAB composites</b> .....                                                                                                                                                   | 4  |
| <b>UV light irradiation procedure</b> .....                                                                                                                                                                                         | 5  |
| <b>XRPD</b> .....                                                                                                                                                                                                                   | 5  |
| <b>Solid-state NMR</b> .....                                                                                                                                                                                                        | 5  |
| <b>DFT Calculation Details</b> .....                                                                                                                                                                                                | 5  |
| <b>Figure S1</b> . UV-Vis spectra for increasing concentrations of <i>E</i> -MOAB in MeOH. ....                                                                                                                                     | 7  |
| <b>Figure S2</b> . UV-Vis Calibration curve for <i>E</i> -MOAB in MeOH. ....                                                                                                                                                        | 7  |
| <b>Table S1</b> . Table for the calibration curve for <i>E</i> -MOAB. ....                                                                                                                                                          | 8  |
| <b>Table S2</b> . Determination of the number of moles of <i>E</i> -MOAB in 1 $\supset$ MOAB (25mL of MeOH). ....                                                                                                                   | 8  |
| <b>Table S3</b> . Determination of the ratio of 1 to <i>E</i> -MOAB in 1 $\supset$ MOAB. ....                                                                                                                                       | 8  |
| <b>Figure S3</b> . DSC thermograms of 1 $\supset$ MOAB and 1 $\supset$ MOAB pre-vacuum treatment. Endothermic transitions below 100 °C are melting transitions for polymorphs of MOAB. These are absent from 1 $\supset$ MOAB. .... | 9  |
| <b>Figure S4</b> . XRPD comparison for 1 $\supset$ MOAB composites. ....                                                                                                                                                            | 9  |
| <b>Figure S5</b> . Le Bail fit of 1 $\supset$ MOAB. ....                                                                                                                                                                            | 10 |
| <b>Figure S6</b> . VT-PXRD patterns for 1 $\supset$ MOAB. ....                                                                                                                                                                      | 10 |

|                                                                                                                                                                                                                                                                                                         |    |
|---------------------------------------------------------------------------------------------------------------------------------------------------------------------------------------------------------------------------------------------------------------------------------------------------------|----|
| <b>Table S4.</b> Temperature-dependent unit cell lengths for the <i>Cmmm</i> ( <i>np</i> ) phase of <b>1</b> ⊃MOAB, brackets indicate axes converted from <i>P4/mmm</i> ( <i>lp</i> ) phase.....                                                                                                        | 11 |
| <b>Table S5.</b> Temperature-dependent unit cell expansion/ contraction for the <i>Cmmm</i> ( <i>np</i> ) phase of <b>1</b> ⊃MOAB, brackets indicate axes converted from <i>P4/mmm</i> ( <i>lp</i> ) phase.....                                                                                         | 11 |
| <b>Figure S7.</b> Le Bail fit of <b>1</b> ⊃MOAB at 40 .....                                                                                                                                                                                                                                             | 11 |
| <b>Figure S8.</b> Le Bail fit of <b>1</b> ⊃MOAB at 60 .....                                                                                                                                                                                                                                             | 12 |
| <b>Figure S9.</b> Le Bail fit of <b>1</b> ⊃MOAB at 80 .....                                                                                                                                                                                                                                             | 12 |
| <b>Figure S10.</b> Le Bail fit of <b>1</b> ⊃MOAB at 100 .....                                                                                                                                                                                                                                           | 12 |
| <b>Figure S11.</b> Le Bail fit of <b>1</b> ⊃MOAB at 120 .....                                                                                                                                                                                                                                           | 13 |
| <b>Figure S12.</b> Le Bail fit of <b>1</b> ⊃MOAB at 140 .....                                                                                                                                                                                                                                           | 13 |
| <b>Figure S13a.</b> Le Bail fit of <b>1</b> ⊃MOAB at 160 °C.....                                                                                                                                                                                                                                        | 13 |
| <b>Figure S13b.</b> Le Bail fit of <b>1</b> ⊃MOAB at 180 °C.....                                                                                                                                                                                                                                        | 14 |
| <b>Figure S14.</b> <sup>13</sup> C CPMAS NMR spectra comparing the chemical shifts of <b>1</b> , MOAB and of <b>1</b> ⊃MOAB. ....                                                                                                                                                                       | 14 |
| <b>Figure S15.</b> <sup>13</sup> C CPMAS NMR spectra of <b>1</b> ⊃MOAB recorded with different cross-polarisation contact times. ....                                                                                                                                                                   | 15 |
| <b>Figure S16.</b> <sup>13</sup> C CPMAS NMR spectra of <b>1</b> ⊃MOAB between 10 – 60 ppm at different MAS frequencies.....                                                                                                                                                                            | 16 |
| <b>Figure S17.</b> Variable temperature <sup>13</sup> C CPMAS NMR spectra of <b>1</b> ⊃MOAB between 110 – 180 ppm. ....                                                                                                                                                                                 | 17 |
| <b>Table S6.</b> Calculated chemical shifts for a static molecule of <i>E</i> -MOAB. The CASTEP code was used to geometry-optimize a single molecule within a unit cell with fixed dimensions of 10 x 10 x 10 Å before NMR parameters were calculated.....                                              | 18 |
| <b>Table S7.</b> CASTEP calculated chemical shifts for <i>E</i> -MOAB assuming fast rotational averaging around the central molecular axis .....                                                                                                                                                        | 18 |
| <b>Figure S18.</b> Variable-temperature <sup>13</sup> C CPMAS NMR spectra of <b>1</b> ⊃MOAB which are compared to the calculated <sup>13</sup> C chemical shifts of <i>E</i> -MOAB. Static and dynamic models for the <i>E</i> -MOAB molecule are shown. ....                                           | 19 |
| <b>Figure S19.</b> DSC thermogram of <b>1</b> ⊃MOAB at a rate of 20 °C min <sup>-1</sup> .....                                                                                                                                                                                                          | 20 |
| <b>Table S8.</b> Thermal data for the first heating branch of <b>1</b> ⊃MOAB between 0 – 180 °C at varying heating rates. ....                                                                                                                                                                          | 20 |
| <b>Table S9.</b> Thermal data for the first cooling branch of <b>1</b> ⊃MOAB between 0 – 180 °C at varying cooling rates.....                                                                                                                                                                           | 20 |
| <b>Figure S20.</b> Solid-state UV-Vis diffuse reflectance spectra of <i>E</i> -MOAB and <i>Z</i> -MOAB.....                                                                                                                                                                                             | 21 |
| <b>Figure S21.</b> Solid-state UV-Vis diffuse reflectance spectra of <b>1</b> , <b>1</b> ⊃MOAB and irradiated <b>1</b> ⊃MOAB. ....                                                                                                                                                                      | 21 |
| <b>Figure S22.</b> <sup>1</sup> H NMR spectra of a) <i>E</i> -MOAB, b) irradiated MOAB (2h), c) MOAB redissolved from <b>1</b> ⊃MOAB c) before and d) after 540 minutes of irradiation, in benzene- <i>d</i> <sub>6</sub> . ....                                                                        | 22 |
| <b>Figure S23.</b> Plot of <i>Z</i> -MOAB population in benzene- <i>d</i> <sub>6</sub> as a function of time following irradiation at 365 nm. ....                                                                                                                                                      | 23 |
| <b>Figure S24.</b> Plot showing ln( <i>N<sub>t</sub></i> / <i>N<sub>0</sub></i> ) as a function of time, where <i>N<sub>0</sub></i> is the population of <i>Z</i> -MOAB immediately after irradiation and <i>N<sub>t</sub></i> is the population of <i>Z</i> -MOAB at time <i>t</i> . Measurements were |    |

|                                                                                                                                                                                                                                                             |    |
|-------------------------------------------------------------------------------------------------------------------------------------------------------------------------------------------------------------------------------------------------------------|----|
| carried out in benzene-d <sub>6</sub> solution. The half-life of Z-MOAB in benzene solution was determined to be 38.5 hours.....                                                                                                                            | 23 |
| <b>Figure S25.</b> The increase in Z-MOAB proportion when MOAB irradiated in the crystalline state. A plateau is reached at 70% Z-MOAB.....                                                                                                                 | 23 |
| <b>Figure S26.</b> DSC thermograms of the first heating branch of 1⊃MOAB with increasing irradiation time with a scan rate of 20 °C min <sup>-1</sup> .....                                                                                                 | 24 |
| <b>Figure S27.</b> DSC cycling (irradiation/heat discharge) thermograms for 1⊃MOAB. The material can be cycled up to five times without a loss in energy density.....                                                                                       | 25 |
| <b>Table S10.</b> DFT calculated energy difference between <i>E</i> -MOAB and <i>Z</i> -MOAB were calculated using the CASTEP code where a single-molecule was confined in a 12 Å x 12 Å x 12 Å cell with fixed unit cell dimensions.....                   | 26 |
| <b>Table S11.</b> Fractional Mass of MOAB in 1⊃MOAB.....                                                                                                                                                                                                    | 26 |
| <b>Table S12.</b> Thermal data for the first heating branch 1⊃MOAB with varying lengths of irradiation.....                                                                                                                                                 | 27 |
| <b>Table S13.</b> Comparison for the experimental energy difference on the first heating branch and the calculated energy difference from <i>Z</i> to <i>E</i> -MOAB.....                                                                                   | 28 |
| <b>Figure S28.</b> Relationship between the experimental energy difference on the first heating branch and the calculated energy difference due to <i>Z-E</i> thermal relaxation in 1⊃MOAB.....                                                             | 29 |
| <b>Figure S29.</b> Successive DSC thermograms for (top) pristine 1⊃MOAB (middle) irradiated 1⊃MOAB and (bottom) thermally reconverted 1⊃MOAB.....                                                                                                           | 29 |
| <b>Figure S30.</b> XRPD patterns of irradiated 1⊃MOAB with specific times under 365 nm light.....                                                                                                                                                           | 30 |
| <b>Figure S31.</b> Le Bail fit of irradiated 1⊃MOAB.....                                                                                                                                                                                                    | 31 |
| <b>Table S14.</b> DFT calculated energy differences between <i>E</i> and <i>Z</i> isomers of ortho fluorinated azobenzenes (AB-F <sub>x</sub> ) which were reported to be occluded in MOFs.....                                                             | 32 |
| <b>Table S15.</b> Calculated chemical shifts for a static molecule of <i>Z</i> -MOAB. The CASTEP code was used to geometry-optimize a single molecule within a unit cell with fixed dimensions of 12 x 12 x 12 Å before NMR parameters were calculated..... | 33 |
| <b>Table S16.</b> CASTEP-calculated chemical shifts for a dynamic molecule of <i>Z</i> -MOAB.....                                                                                                                                                           | 33 |
| <b>Figure S32.</b> Comparison of the DABCO and methoxy regions of <sup>13</sup> C CPMAS NMR spectra of 1⊃MOAB and irradiated 1⊃MOAB.....                                                                                                                    | 34 |
| <b>Figure S33.</b> Comparison of the aromatic regions of <sup>13</sup> C CPMAS NMR spectra of irradiated 1⊃MOAB to calculated chemical shifts for <i>Z</i> -MOAB.....                                                                                       | 34 |
| <b>Table S17.</b> Population of <i>Z</i> -MOAB in 1⊃MOAB measured at different time intervals over a period of one month.....                                                                                                                               | 35 |
| <b>Figure S34.</b> Decay plots for the <i>Z</i> -MOAB isomer with respect to order of decay.....                                                                                                                                                            | 36 |

## Experimental Details

**Synthesis of 1.** All reagents were obtained from Fluorochem and used without further purification.  $\text{Zn}_2(\text{BDC})_2(\text{DABCO})$  was synthesised according to previously reported synthetic procedures.  $\text{Zn}(\text{NO}_3)_2 \cdot 6\text{H}_2\text{O}$  (1.68 mmol) was sonicated in *N,N*-dimethylformamide (DMF, 20 mL) until fully dissolved, 1,4-dibenzendicarboxylic acid (0.28 g, 1.68 mmol) and DABCO (0.093 g, 0.84 mmol) were then added. The reactant solution was placed in a stainless-steel autoclave (Parr) with a Teflon lining with a 50 mL capacity. The solution was heated at 120 °C for 48 h and left to cool to room temperature. The colourless crystals (yield - 81%) were collected via vacuum filtration and washed with DMF (3 x 30 mL) before drying under ambient conditions. Phase purity of the compounds was confirmed by Le Bail fitting of the XRPD patterns.

**Loading of 1 with MOAB.** Samples of **1** were loaded with MOAB using a previously published melt-infiltration procedure. As-prepared samples of **1** were first heated at 120 °C under vacuum for 24 h to remove DMF solvent molecules. 300 mg of the evacuated material was then mixed with a defined mass of *E*-MOAB and heated at 120 °C for 3 h. Excess MOAB was removed by heating at 120 °C under vacuum for 20 h.

**Quantification of MOAB loading level by UV-vis spectroscopy.** UV-vis data was collected on a Cary 60 UV/VIS spectrophotometer with a quartz cell (3 mL) within a 200-600 nm range. A calibration curve with known concentrations of *E*-MOAB was constructed (see Figures S1 and S2).

**Quantification of loading level by acid digestion and  $^1\text{H}$  NMR spectroscopy.** 10 mg of **1**MOAB was suspended in DCl (1.5 mL) and  $\text{DMSO-d}_6$  (1.5 mL) and placed in a stainless-steel autoclave (Parr) with a Teflon lining with a 50 mL capacity. The suspension was heated for 12 h at 100 °C to yield a transparent solution. A Bruker Avance III 400 NMR spectrometer with a 5 mm  $^1\text{H}$ -X broadband observe probe was used to collect  $^1\text{H}$  NMR data. The  $^1\text{H}$  NMR spectrum of the solution was taken and the ratio between DABCO, BDC and *E*-MOAB was determined from the integration of characteristic  $^1\text{H}$  resonances.

**PSS determination of irradiated **1**MOAB composites.** A 25 mg sample of **1**MOAB was suspended in benzene- $\text{d}_6$  (0.5 mL) in an Eppendorf and shaken. The Eppendorf was centrifuged to separate the solid from the solution. A Bruker Avance III 400 NMR spectrometer with a 5 mm  $^1\text{H}$ -X broadband observe probe was used to collect  $^1\text{H}$  NMR data. The population ratio of *E*-MOAB and *Z*-MOAB isomers was determined from integration of *Z*-isomer and *E*-isomer resonances in the  $^1\text{H}$  NMR spectrum based on literature values. The remaining solid was digested in DCl (1.5 mL) and  $\text{DMSO-d}_6$  (1.5 mL) and placed in a stainless-steel autoclave (Parr) with a Teflon lining with a 50 mL capacity. The suspension was heated for 12 h at 100 °C to yield a transparent solution. The  $^1\text{H}$  NMR spectrum of the solution was taken, and no residual *Z*-MOAB or *E*-MOAB resonances were detected. The process was repeated three separate times and *E/Z* ratios were consistent.

**UV light irradiation procedure.** Samples were irradiated with an OmniCure LX5 LED Head with a power of 425 mW and a 12 mm focusing lens. 50 mg of finely ground 1 $\Rightarrow$ MOAB was spread homogeneously over a microscope slide. The powder was spread into a circle with a 1 cm radius which was approximately 0.5 mm thick so that irradiation was approximately uniform. The irradiance at central point was 0.3 W cm<sup>-2</sup>. The slide was placed under 365 nm light at a distance of 5 cm. The beam was set to 100% intensity and exposed for a fixed duration. The sample was agitated, at increments of 5 minutes, to allow all particulates to be exposed to the beam.

**XRPD.** X-ray powder diffraction (XRPD) patterns were measured with a Rigaku SmartLab X-ray diffractometer with a 9 kW rotating anode Cu-source equipped with a high-resolution Vertical  $\theta/\theta$  4-Circle Goniometer and D/teX-ULTRA 250 High-Speed Position-Sensitive Detector System in reflectance mode. The system was configured with parallel-beam optics and a Ge(220) 2 bounce monochromator on the incident side. Powdered solid samples were prepared on glass slides. The measurements were performed as  $\theta/2\theta$  scans with a step size of 0.01 degrees. Variable-temperature measurements were carried out by loading the powder sample into 1 mm diameter thin-walled (0.1 mm) borosilicate capillaries, with the capillary loosely sealed with silicone grease to allow for pressure to be released upon heating. The capillary was loaded on a BTS-500 Anton Parr heating stage equipped with a zero-background holder and mounted on a Rigaku SmartLab (9 kW) diffractometer. The heating stage was purged with nitrogen for 30 minutes prior to analysis. The diffractometer was used with parallel-beams optics and a 5 degree soller slit, and a Dtex-250 Ultra 1D detector. The sample run was carried out using a 2-theta scan with a step size of 0.01 degrees 2-theta, and a scanning rate of 4 degrees per minute.

**Solid-state NMR.** Solid-state NMR experiments were performed on Bruker Avance III HD spectrometer operating at magnetic field strength of 16.4 T, corresponding to <sup>1</sup>H and <sup>13</sup>C Larmor frequencies of 700 and 176 MHz, respectively. Spectra are referenced relative to tetramethylsilane (<sup>13</sup>C / <sup>1</sup>H) using the CH<sub>3</sub> (<sup>1</sup>H = 1.1 ppm; <sup>13</sup>C = 20.5 ppm) resonances of *L*-alanine as a secondary reference. <sup>13</sup>C NMR spectra were recorded at a magic-angle spinning (MAS) rate of 16.0 kHz using cross polarization (CP) to transfer magnetization from <sup>1</sup>H with a contact time of 3 ms. The CP pulse was ramped linearly from 70 – 100% power. <sup>1</sup>H heteronuclear decoupling using two-pulse phase modulation (TPPM)<sup>45</sup> with a pulse length of 4.8  $\mu$ s and a radiofrequency field strength of 100 kHz was applied during acquisition. Spectra are the sum of 512 transients separated by a recycle interval of 10 s. The sample temperature in variable-temperature experiments was calibrated using Pb(NO<sub>3</sub>)<sub>2</sub>.<sup>46</sup>

#### **DFT Calculation Details**

First-principles calculations of NMR parameters were carried out under periodic boundary conditions using the CASTEP code<sup>1</sup> employing the gauge-including projector augmented wave (GIPAW) algorithm,<sup>2</sup> which allows the reconstruction of the all-electron wave function in the presence of a magnetic field. The CASTEP calculations employed the generalised gradient approximation Perdew–

Burke–Ernzerhof exchange–correlation functional,<sup>3</sup> and core–valence interactions were described by ultrasoft pseudopotentials.<sup>4</sup>

Prior to calculation of the NMR parameters, structures were fully geometry optimised using the G06 semiempirical dispersion correction scheme<sup>5</sup> and allowing all atomic positions to vary. For calculations on guest-free frameworks, the input atomic co-ordinates were taken from structures published by Dybtsev *et al.*, with the guest molecule atoms deleted where appropriate.<sup>6</sup> The tetragonal *lp* structure was based on the empty framework structure, the orthorhombic *np* structure was based on the benzene-loaded structure, and the distorted tetragonal *np* structure was based on the DMF-loaded structure. These structures also required deletion of some of the atoms representing the dynamic disorder of the DABCO group in order to make a chemically sensible input structure. The structures were then optimized while keeping the unit cell parameters fixed to the experimental values.

Single-molecule calculations were carried out in a  $20 \times 20 \times 20$  Å cell with fixed cell parameters to ensure molecules remained isolated from periodic replicas.

Geometry optimisations and NMR calculations were carried out using a planewave energy cut-off of 60 Ry, and for crystal structures, a k-point spacing of  $0.05 \ 2\pi \ \text{Å}^{-1}$  was used. For single-molecule calculations, a single k-point at the fractional coordinate (0.25, 0.25, 0.25) was used. The calculations generate the absolute shielding tensor ( $\sigma$ ) in the crystal frame. Diagonalisation of the symmetric part of  $\sigma$  yields the three principal components,  $\sigma_{XX}$ ,  $\sigma_{YY}$ , and  $\sigma_{ZZ}$ . The isotropic shielding,  $\sigma_{\text{ISO}}$ , is given by  $(1/3) \text{Tr} [\sigma]$ . The isotropic chemical shift,  $\delta_{\text{ISO}}$ , is given by  $\sigma_{\text{ref}} - \sigma_{\text{ISO}}$ , where  $\sigma_{\text{ref}}$  is a reference shielding. Reference shieldings were determined by comparison of experimental chemical shifts for *L*-alanine with shieldings obtained from a calculation on a fully optimised crystal structure<sup>7</sup> (Cambridge Structural Database code LALNIN22). For  $^1\text{H}$  and  $^{13}\text{C}$ , reference shieldings were determined from the *y* intercept of a linear fit to the experimental shifts versus calculated shielding, with the gradient of the fit fixed to  $-1$ . Calculated shieldings for the three methyl protons were averaged to account for rapid rotation of the methyl group. Respective reference shieldings of 30.2 and 168.4 ppm were obtained for  $^1\text{H}$  and  $^{13}\text{C}$ . Calculated chemical shifts for the individual carbons in DABCO groups were averaged to account for the fast rotational dynamics of this group.

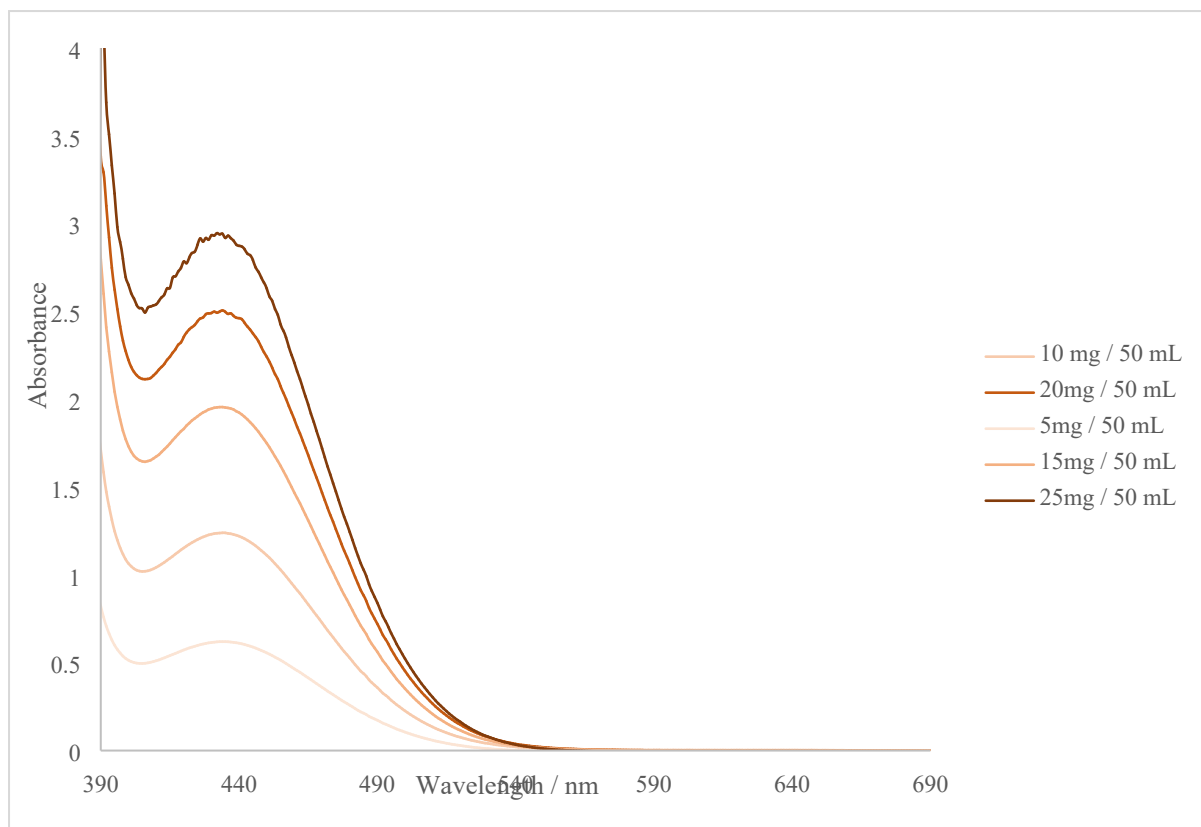

**Figure S1.** UV-Vis spectra for increasing concentrations of *E*-MOAB in MeOH.

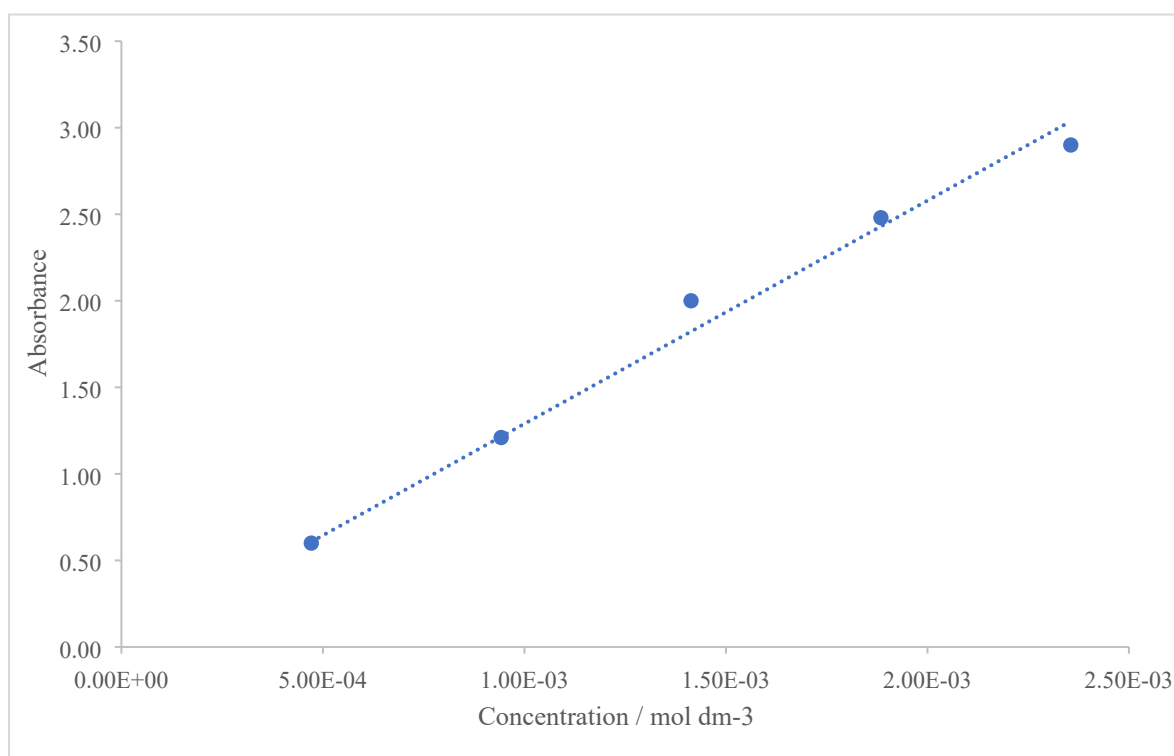

**Figure S2.** UV-Vis Calibration curve for *E*-MOAB in MeOH.

**Table S1.** Table for the calibration curve for *E*-MOAB.

| mass / mg | mass / g | Moles / mol | concentration / mol dm <sup>-3</sup> | Absorbance |
|-----------|----------|-------------|--------------------------------------|------------|
| 5         | 0.005    | 0.000023557 | 4.71E-04                             | 0.60       |
| 10        | 0.01     | 0.000047114 | 9.42E-04                             | 1.21       |
| 15        | 0.015    | 0.000070671 | 1.41E-03                             | 2.00       |
| 20        | 0.02     | 0.000094229 | 1.88E-03                             | 2.48       |
| 25        | 0.025    | 0.000117786 | 2.36E-03                             | 2.90       |

**Table S2.** Determination of the number of moles of *E*-MOAB in 1▷MOAB (25mL of MeOH).

| Entry | Mass of 1MOAB / mg | mass / g | Absorbance | Concentration / mol dm <sup>-3</sup> | Moles / mol  | mass of MOAB / g | mass / mg   |
|-------|--------------------|----------|------------|--------------------------------------|--------------|------------------|-------------|
| 1     | 19.8               | 0.0198   | 1.53       | 0.001185587                          | 0.0000296397 | 0.006291021      | 6.291020922 |
| 2     | 18.7               | 0.0187   | 1.46       | 0.001131344                          | 0.0000282836 | 0.006003196      | 6.003196435 |
| 3     | 19.3               | 0.0193   | 1.48       | 0.001146842                          | 0.0000286711 | 0.006085432      | 6.085432003 |
|       |                    |          |            |                                      |              |                  | 6.126549787 |

**Table S3.** Determination of the ratio of 1 to *E*-MOAB in 1▷MOAB.

| Entry | Mass of 1 /mg | Mass of 1 / g | mol of 1 / mol | mol of MOAB  | Ratio 1 | Ratio MOAB  |
|-------|---------------|---------------|----------------|--------------|---------|-------------|
| 1     | 13.50897908   | 0.013508979   | 0.000023650588 | 0.0000296397 | 1       | 1.253232062 |
| 2     | 12.69680356   | 0.012696804   | 0.000022228687 | 0.0000282836 | 1       | 1.272392353 |
| 3     | 13.214568     | 0.013214568   | 0.000023135153 | 0.0000286711 | 1       | 1.239285421 |
|       |               |               |                |              |         | 1.254969945 |



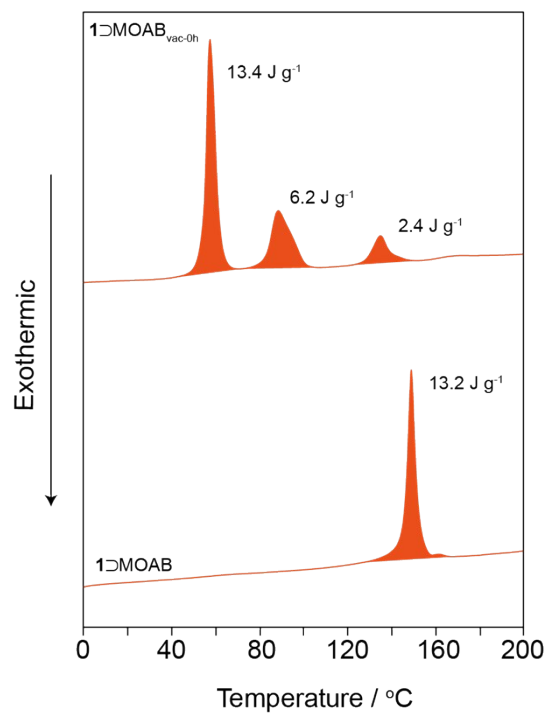

**Figure S3.** DSC thermograms of  $1\text{D-MOAB}$  and  $1\text{D-MOAB}$  pre-vacuum treatment. Endothermic transitions below  $100\text{ }^{\circ}\text{C}$  are melting transitions for polymorphs of MOAB. These are absent from  $1\text{D-MOAB}$ .

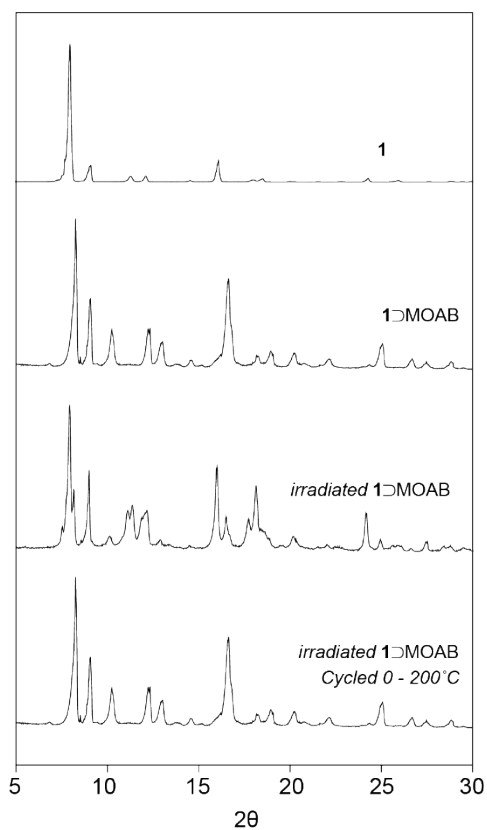

**Figure S4.** XRPD comparison for  $1\text{D-MOAB}$  composites.

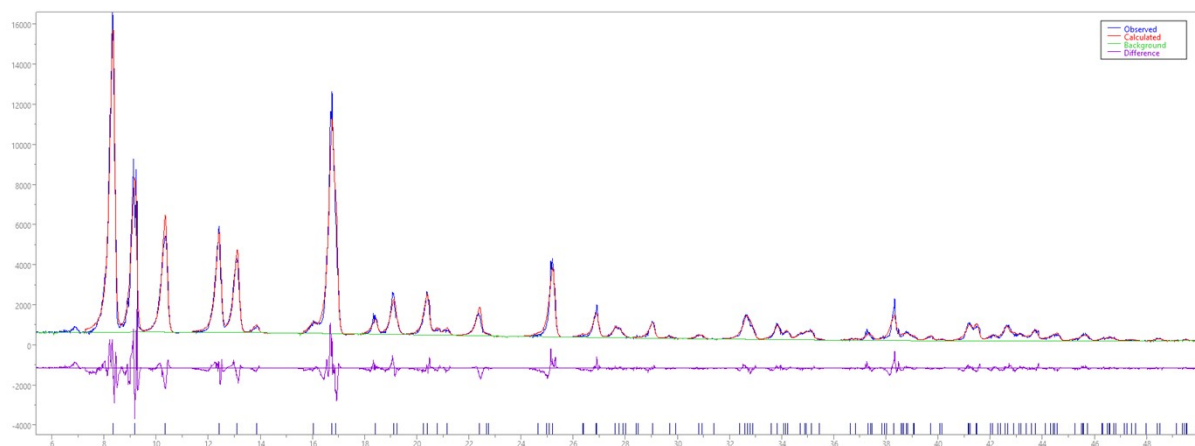

**Figure S5.** Le Bail fit of 1D-MOAB. The crystal system was found to be orthorhombic. The lattice parameters were refined to be  $a = 13.492(2) \text{ \AA}$ ,  $b = 17.129(4)$ ,  $c = 9.679(8) \text{ \AA}$ ,  $a = b = g = 90^\circ$ ,  $V = 2236.9(3) \text{ \AA}^3$ . The space group was found to be  $Cmmm$ . General formula  $Zn_8C_{128}H_{120}N_{16}O_{32}$ . The reliability (R) factor based on the powder profile  $R_p$  was 8.65 %.

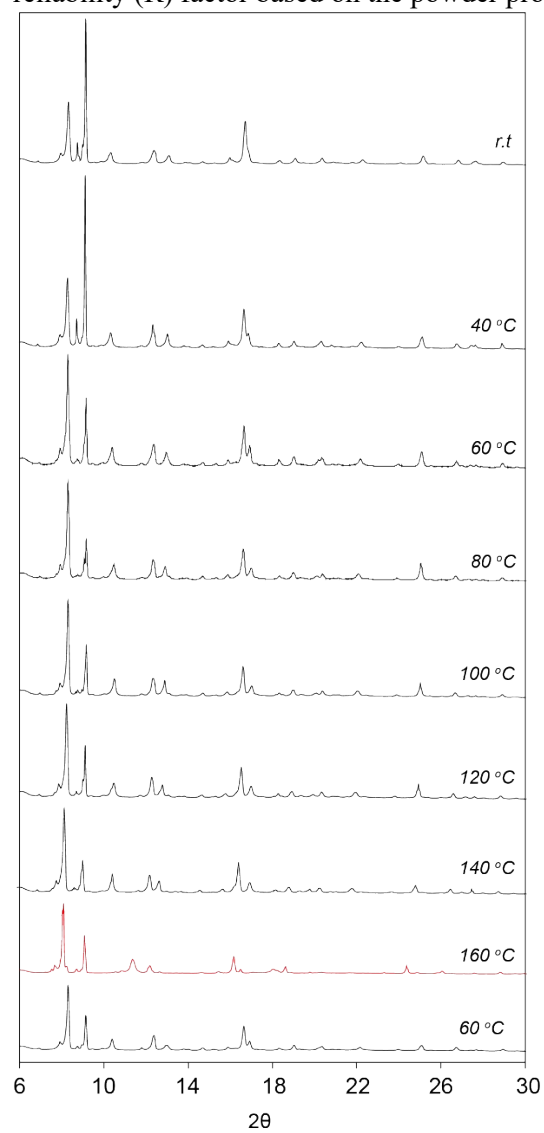

**Figure S6.** VT-PXRD patterns for 1D-MOAB.

**Table S4.** Temperature-dependent unit cell lengths for the *Cmmm* (*np*) phase of **1**▷MOAB, brackets indicate axes converted from *P4/mmm* (*lp*) phase.

| Temperature / °C | <i>a</i> / Å | <i>b</i> / Å | <i>c</i> / Å | V / Å <sup>3</sup> |
|------------------|--------------|--------------|--------------|--------------------|
| 20               | 13.492       | 17.129       | 9.679        | 2236.9             |
| 40               | 13.566       | 17.105       | 9.681        | 2246.4             |
| 60               | 13.629       | 17.049       | 9.679        | 2249.0             |
| 80               | 13.701       | 16.944       | 9.672        | 2245.4             |
| 100              | 13.754       | 16.855       | 9.681        | 2244.3             |
| 120              | 13.788       | 16.768       | 9.681        | 2238.2             |
| 140              | 13.802       | 16.703       | 9.681        | 2231.8             |
| [160]            | [15.501]     | [15.501]     | [9.706]      | [2332.2]           |
| [180]            | [15.501]     | [15.501]     | [9.706]      | [2332.2]           |

**Table S5.** Temperature-dependent unit cell expansion/ contraction for the *Cmmm* (*np*) phase of **1**▷MOAB, brackets indicate axes converted from *P4/mmm* (*lp*) phase.

| Temperature | <i>a</i> expansion / % | <i>b</i> contraction / % | <i>c</i> / % | V / %  |
|-------------|------------------------|--------------------------|--------------|--------|
| 20          | 0.00                   | 0.00                     | 0.00         | 0.00   |
| 40          | 0.55                   | -0.14                    | 0.02         | 0.42   |
| 60          | 1.02                   | -0.47                    | 0.00         | 0.55   |
| 80          | 1.55                   | -1.08                    | -0.37        | 0.61   |
| 100         | 1.94                   | -1.60                    | 0.02         | 0.33   |
| 120         | 2.20                   | -2.11                    | 0.02         | 0.06   |
| 140         | 2.30                   | -2.49                    | -0.50        | -0.23  |
| [160]       | [14.9]                 | [-9.50]                  | [0.27]       | [4.26] |
| [180]       | [14.9]                 | [-9.50]                  | [0.27]       | [4.26] |

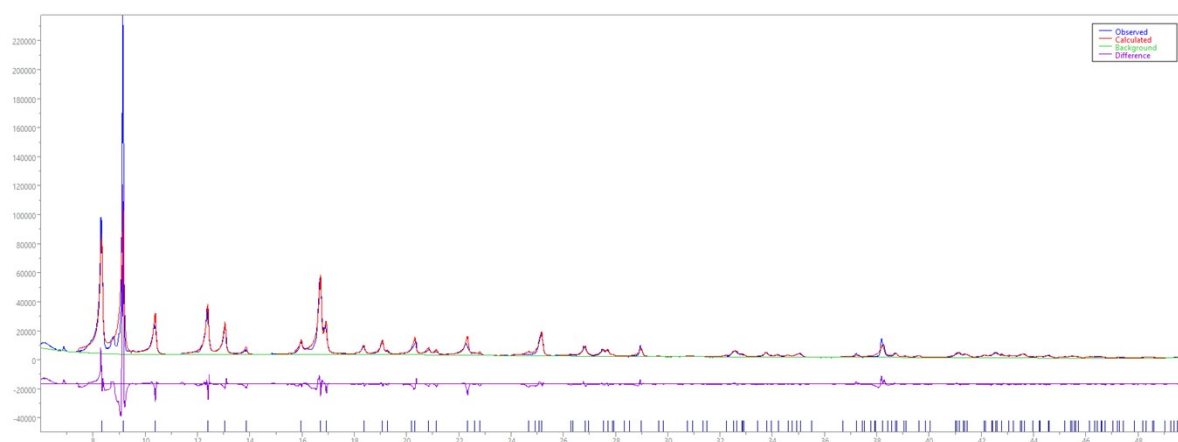

**Figure S7.** Le Bail fit of **1**▷MOAB at 40 °C. The crystal system was found to be orthorhombic. The lattice parameters were refined to be  $a = 13.566(3)$  Å,  $b = 17.105(2)$ ,  $c = 9.681(7)$  Å,  $\alpha = \beta = \gamma = 90^\circ$ ,  $V = 2246.4(4)$  Å<sup>3</sup>. The space group was found to be *Cmmm*. General formula  $Zn_8C_{128}H_{120}N_{16}O_{32}$ . The reliability (R) factor based on the powder profile  $R_p$  was 8.99 %.

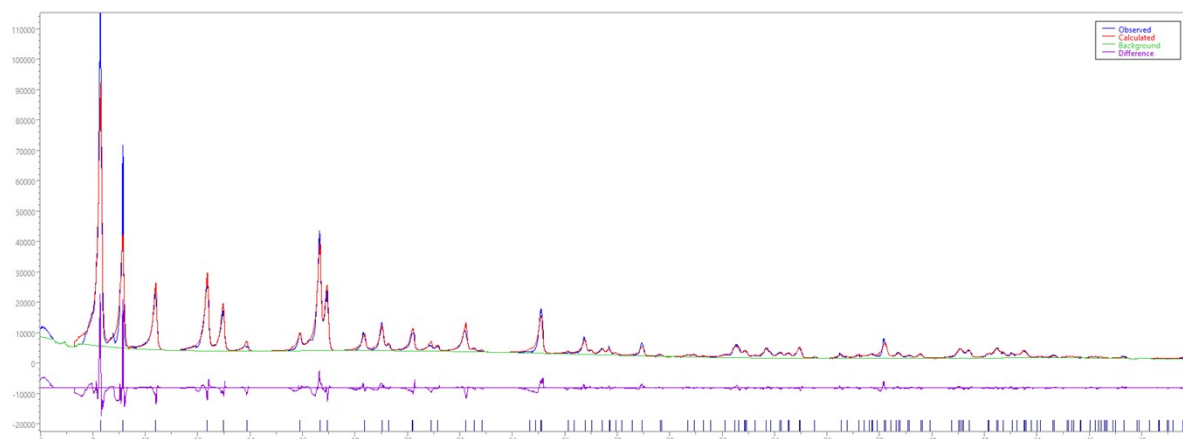

**Figure S8.** Le Bail fit of 1D-MOAB at 60 °C. The crystal system was found to be orthorhombic. The lattice parameters were refined to be  $a = 13.629(4)$  Å,  $b = 17.049(3)$ ,  $c = 9.679(5)$  Å,  $\alpha = \beta = \gamma = 90^\circ$ ,  $V = 2249.0(4)$  Å<sup>3</sup>. The space group was found to be *Cmmm*. General formula  $Zn_8C_{128}H_{120}N_{16}O_{32}$ . The reliability (R) factor based on the powder profile  $R_p$  was 8.12 %.

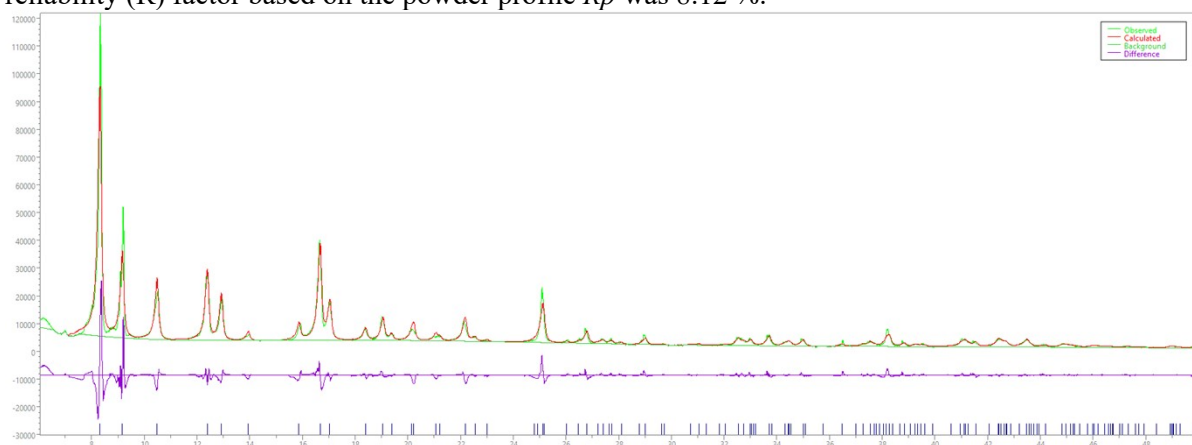

**Figure S9.** Le Bail fit of 1D-MOAB at 80 °C. The crystal system was found to be orthorhombic. The lattice parameters were refined to be  $a = 13.701(2)$  Å,  $b = 16.944(3)$ ,  $c = 9.672(5)$  Å,  $\alpha = \beta = \gamma = 90^\circ$ ,  $V = 2245.4(4)$  Å<sup>3</sup>. The space group was found to be *Cmmm*. General formula  $Zn_8C_{128}H_{120}N_{16}O_{32}$ . The reliability (R) factor based on the powder profile  $R_p$  was 7.01 %.

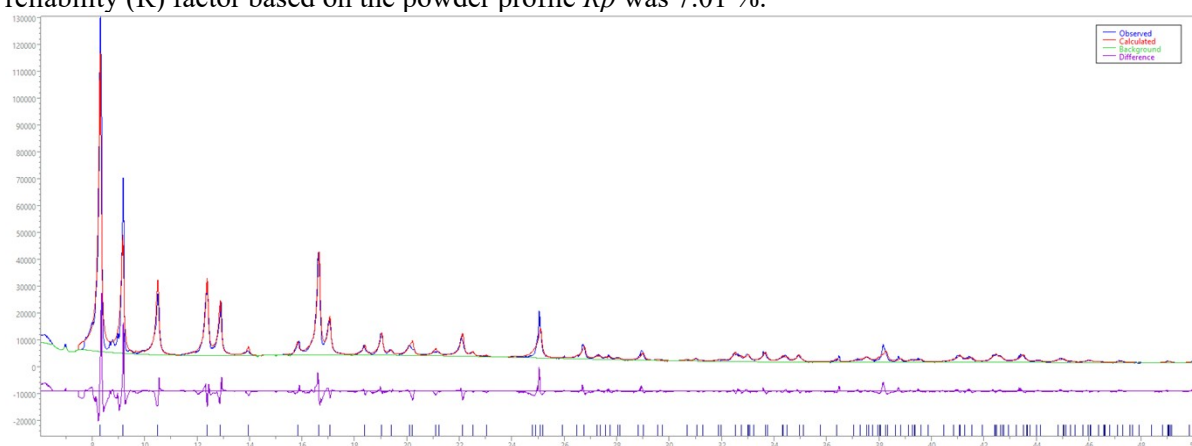

**Figure S10.** Le Bail fit of 1D-MOAB at 100 °C. The crystal system was found to be orthorhombic. The lattice parameters were refined to be  $a = 13.754(3)$  Å,  $b = 16.855(3)$ ,  $c = 9.681(6)$  Å,  $\alpha = \beta = \gamma = 90^\circ$ ,  $V = 2244.3(4)$  Å<sup>3</sup>. The space group was found to be *Cmmm*. General formula  $Zn_8C_{128}H_{120}N_{16}O_{32}$ . The reliability (R) factor based on the powder profile  $R_p$  was 5.11 %.

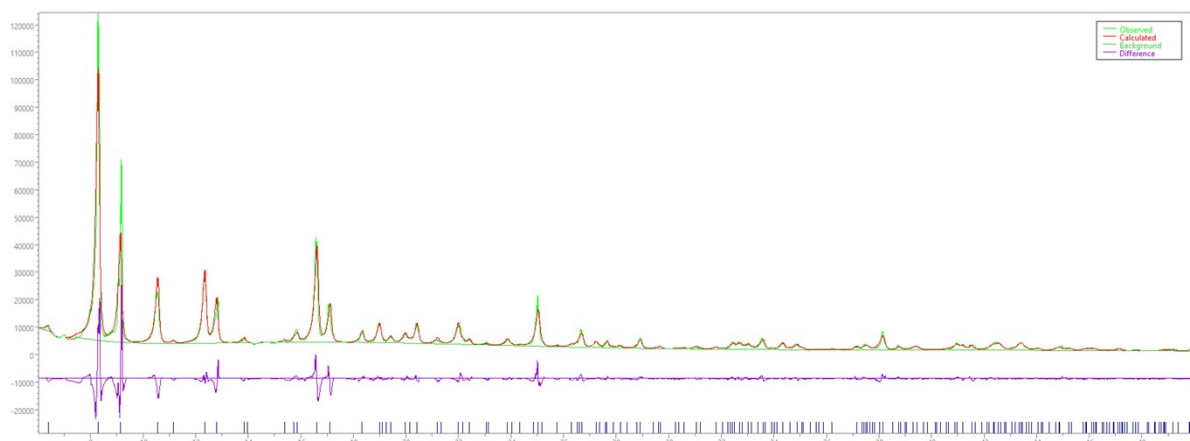

**Figure S11.** Le Bail fit of 1D-MOAB at 120 °C. The crystal system was found to be orthorhombic. The lattice parameters were refined to be  $a = 13.788(4)$  Å,  $b = 16.768(3)$ ,  $c = 9.681(5)$  Å,  $\alpha = \beta = \gamma = 90^\circ$ ,  $V = 2240.4(6)$  Å<sup>3</sup>. The space group was found to be *Cmmm*. General formula  $Zn_8C_{128}H_{120}N_{16}O_{32}$ . The reliability (R) factor based on the powder profile  $R_p$  was 7.95 %.

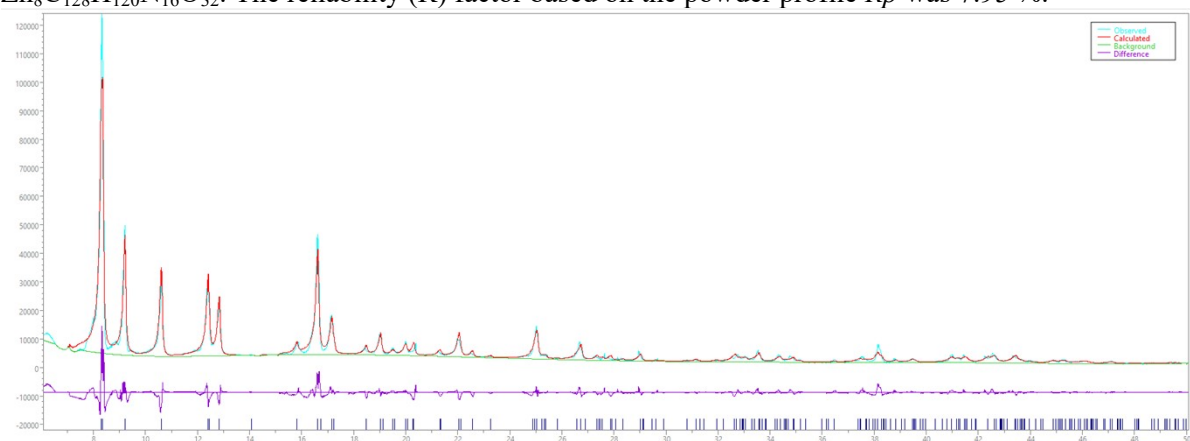

**Figure S12.** Le Bail fit of 1D-MOAB at 140 °C. The crystal system was found to be orthorhombic. The lattice parameters were refined to be  $a = 13.801(2)$  Å,  $b = 16.703(2)$ ,  $c = 9.681(4)$  Å,  $\alpha = \beta = \gamma = 90^\circ$ ,  $V = 2231.8(8)$  Å<sup>3</sup>. The space group was found to be *Cmmm*. General formula  $Zn_8C_{128}H_{120}N_{16}O_{32}$ . The reliability (R) factor based on the powder profile  $R_p$  was 6.57 %.

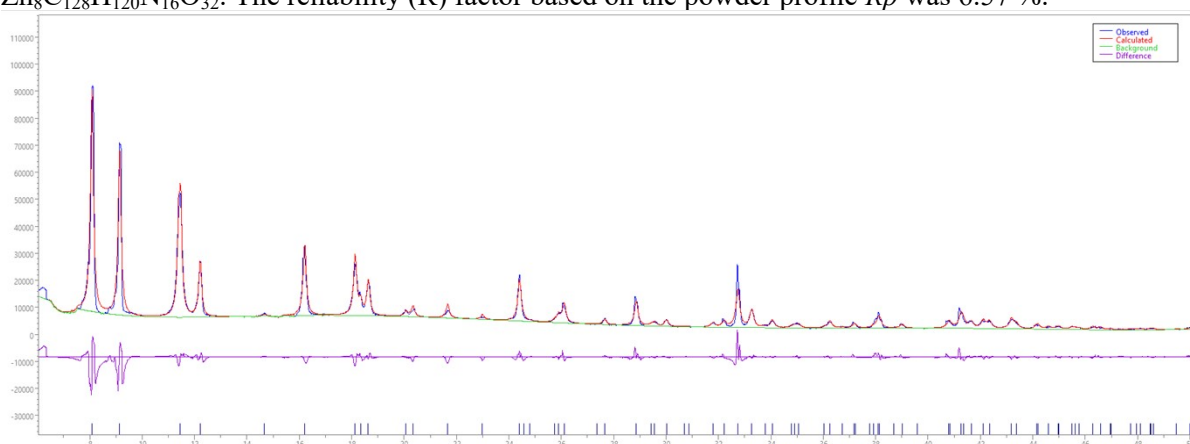

**Figure S13a.** Le Bail fit of 1D-MOAB at 160 °C. The crystal system was found to be tetragonal. The lattice parameters were refined to be  $a = b = 10.961(3)$  Å,  $c = 9.706(2)$  Å,  $\alpha = \beta = \gamma = 90^\circ$ ,  $V = 1166.12(4)$  Å<sup>3</sup>. The space group was found to be *P4/mmm*. General formula  $Zn_4C_{64}H_{60}N_8O_{16}$ . The reliability (R) factor based on the powder profile  $R_p$  was 6.95 %.

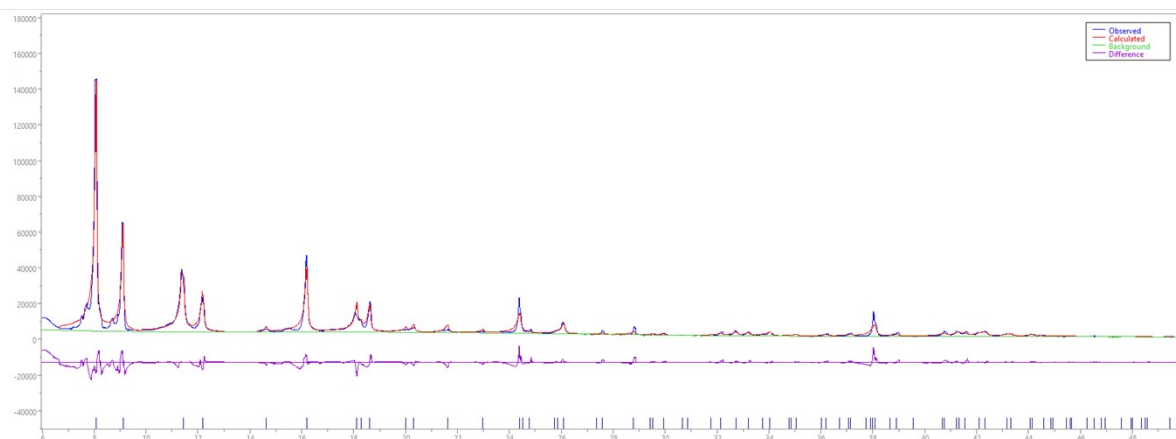

**Figure S13b.** Le Bail fit of **1D**-MOAB at 180 °C. The crystal system was found to be tetragonal. The lattice parameters were refined to be  $a = b = 10.961(4) \text{ \AA}$ ,  $c = 9.706(5) \text{ \AA}$ ,  $\alpha = \beta = \gamma = 90^\circ$ ,  $V = 1166.12(6) \text{ \AA}^3$ . The space group was found to be  $P4/mmm$ . General formula  $\text{Zn}_4\text{C}_{64}\text{H}_{60}\text{N}_8\text{O}_{16}$ . The reliability (R) factor based on the powder profile  $R_p$  was 8.91 %.

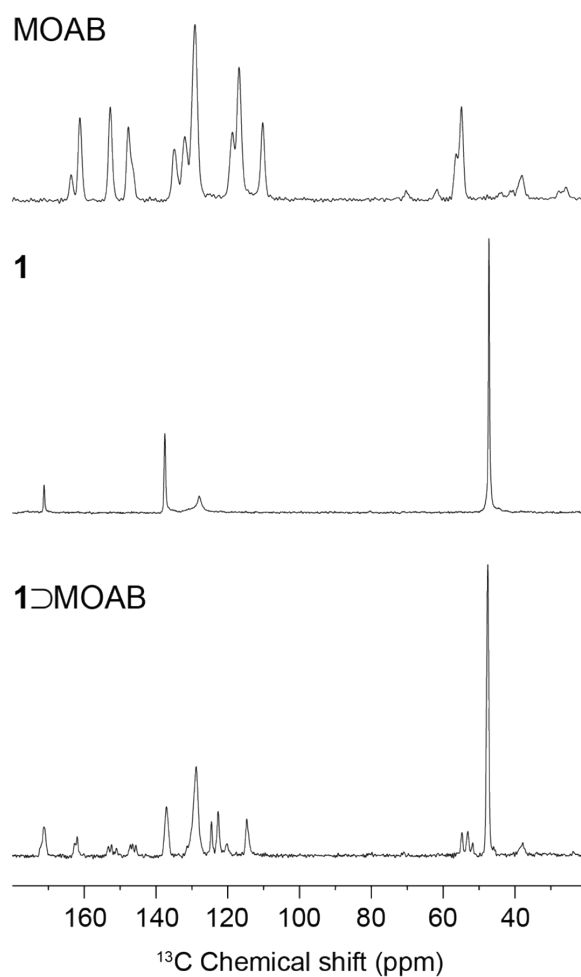

**Figure S14.**  $^{13}\text{C}$  CPMAS NMR spectra comparing the chemical shifts of **1**, MOAB and of **1D**-MOAB.

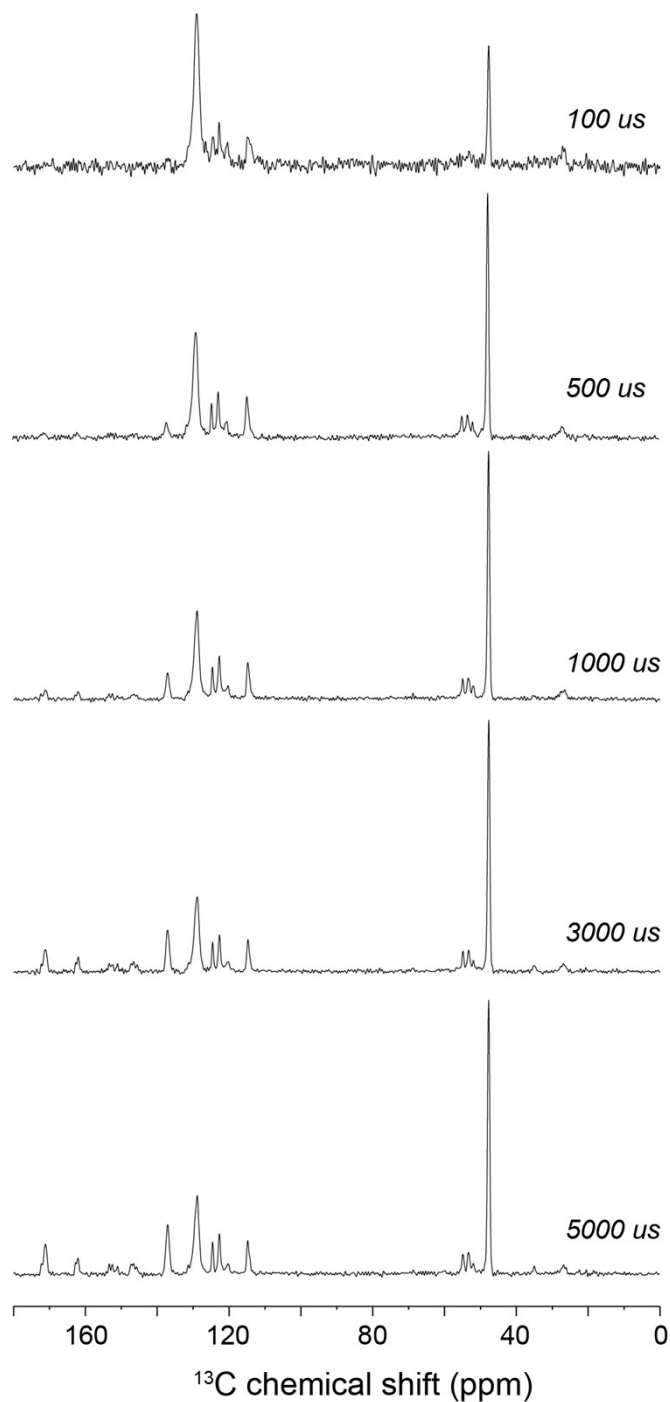

**Figure S15.**  $^{13}\text{C}$  CPMAS NMR spectra of 1D-MOAB recorded with different cross-polarisation contact times.

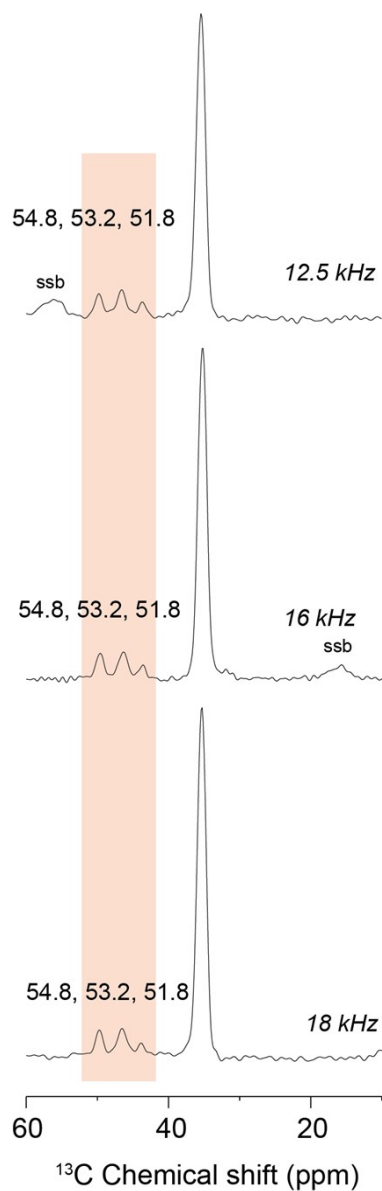

**Figure S16.**  $^{13}\text{C}$  CPMAS NMR spectra of **1**MOAB between 10 – 60 ppm at different MAS frequencies. This confirms the features seen at 51.8 ppm, 53.2 ppm and 54.8 ppm are from the methoxy carbon of MOAB.



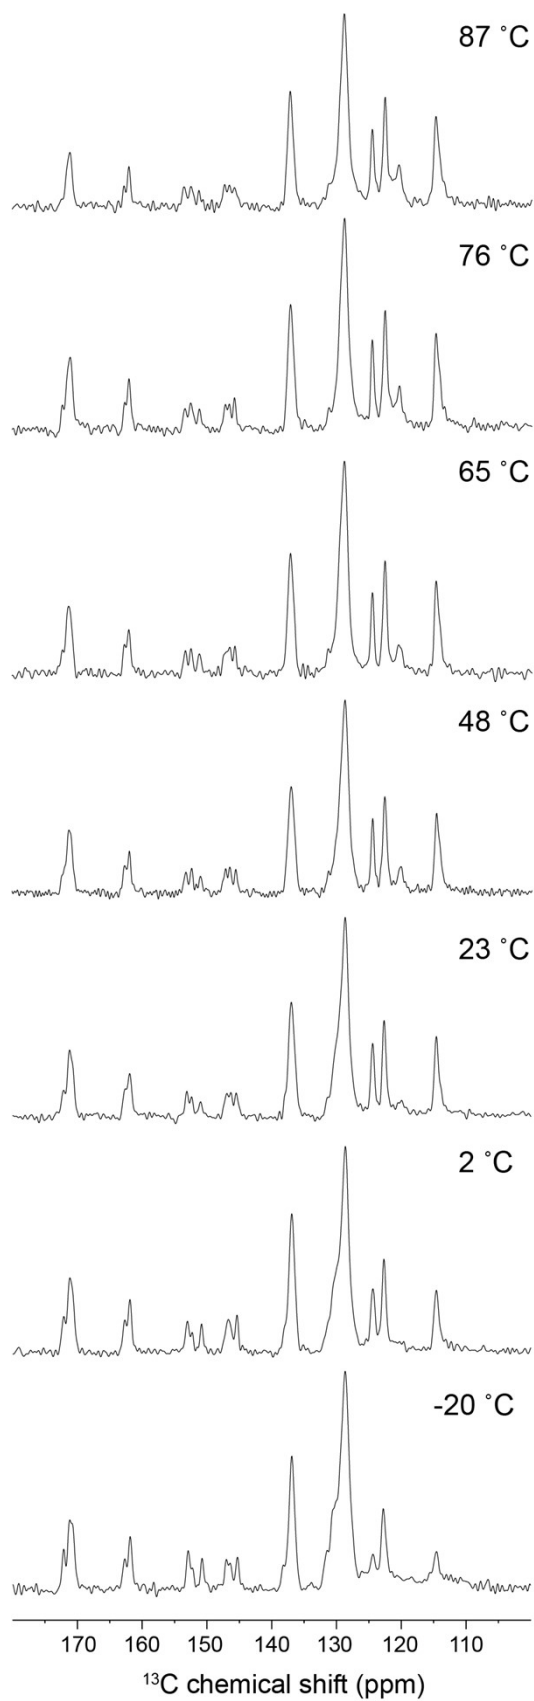

**Figure S17.** Variable temperature  $^{13}\text{C}$  CPMAS NMR spectra of 1-MOAB between 110 – 180 ppm.

**Table S6.** Calculated chemical shifts for a static molecule of *E*-MOAB. The CASTEP code was used to geometry-optimize a single molecule within a unit cell with fixed dimensions of 12 x 12 x 12 Å before NMR parameters were calculated.

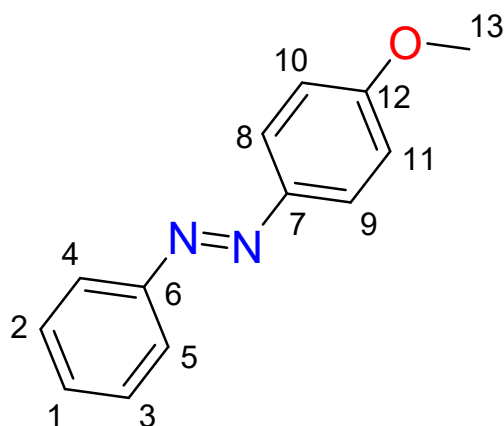

| C site | $\sigma_{\text{iso}}$ | Chemical shift / ppm |
|--------|-----------------------|----------------------|
| 1      | 39.8602               | 128.5998             |
| 2      | 41.931                | 126.529              |
| 3      | 41.4416               | 127.0184             |
| 4      | 58.6355               | 109.8245             |
| 5      | 35.2049               | 133.2551             |
| 6      | 15.6751               | 152.7849             |
| 7      | 21.1183               | 147.3417             |
| 8      | 32.5399               | 135.9201             |
| 9      | 56.5976               | 111.8624             |
| 10     | 63.7801               | 104.6799             |
| 11     | 52.9204               | 115.5396             |
| 12     | 4.8127                | 163.6473             |
| 13     | 118.1348              | 50.3252              |

**Table S7.** CASTEP calculated chemical shifts for *E*-MOAB assuming fast rotational averaging around the central molecular axis

| C site   | $\sigma_{\text{iso}}$ | Chemical shift / ppm |
|----------|-----------------------|----------------------|
| C1       | 39.8602               | 128.5998             |
| C2/C3    | 41.6863               | 126.7737             |
| C4/C5    | 46.9202               | 121.5398             |
| C6       | 15.6751               | 152.7849             |
| C7       | 21.1183               | 147.3417             |
| C8/C9    | 44.56875              | 123.89125            |
| C10/ C11 | 58.35025              | 110.10975            |
| C12      | 4.8127                | 163.6473             |
| C13      | 118.1348              | 50.3252              |

Fast rotational averaging was accounted for by averaging chemical shifts for carbons on opposite sides of the six-membered rings. This simulates the effect of fast rotation of the six-membered rings around the C-N bond. In terms of the predicted chemical shifts, this averaging is also equivalent to

fast pedal motion dynamics of the central N=N linkage – indeed rotation of the rings and pedal motion of the N=N linkage cannot be distinguished by this method.

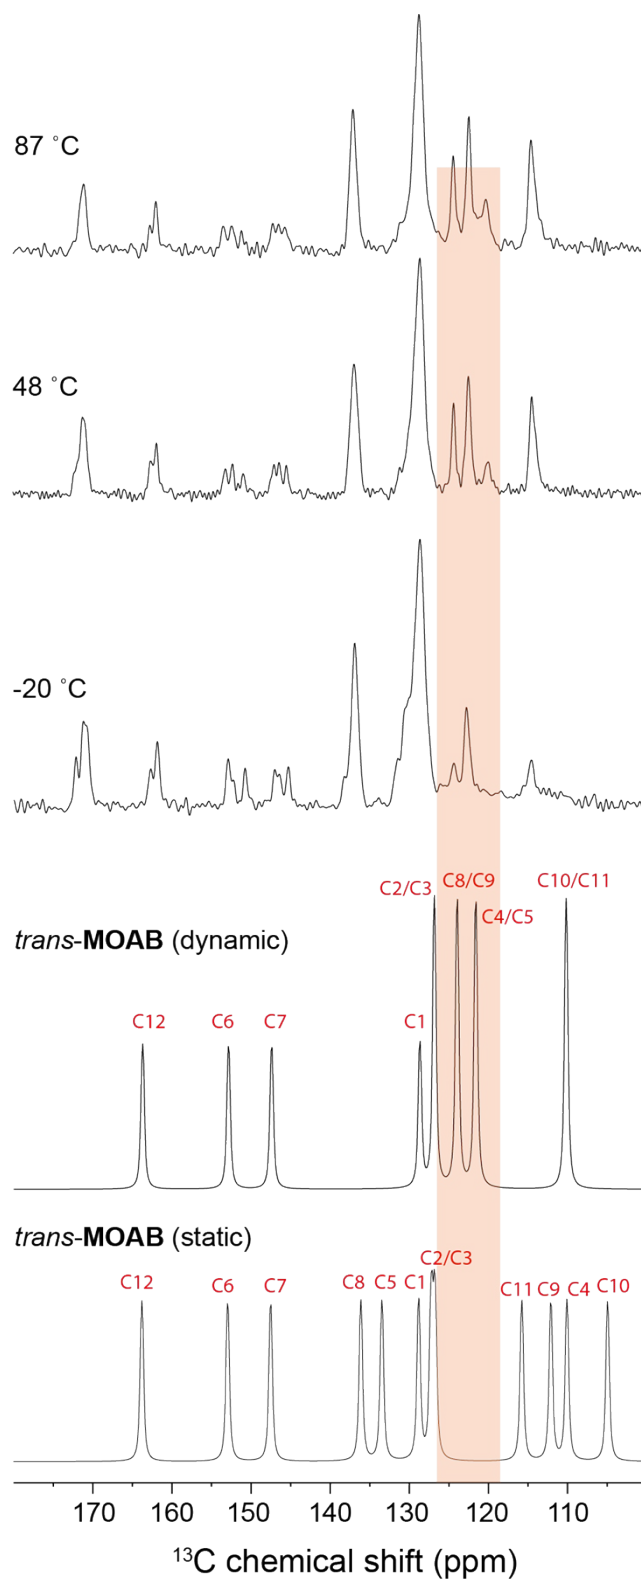

**Figure S18.** Variable-temperature  $^{13}\text{C}$  CPMAS NMR spectra of **1**-MOAB which are compared to the calculated  $^{13}\text{C}$  chemical shifts of *E*-MOAB. Static and dynamic models for the *E*-MOAB molecule are shown.

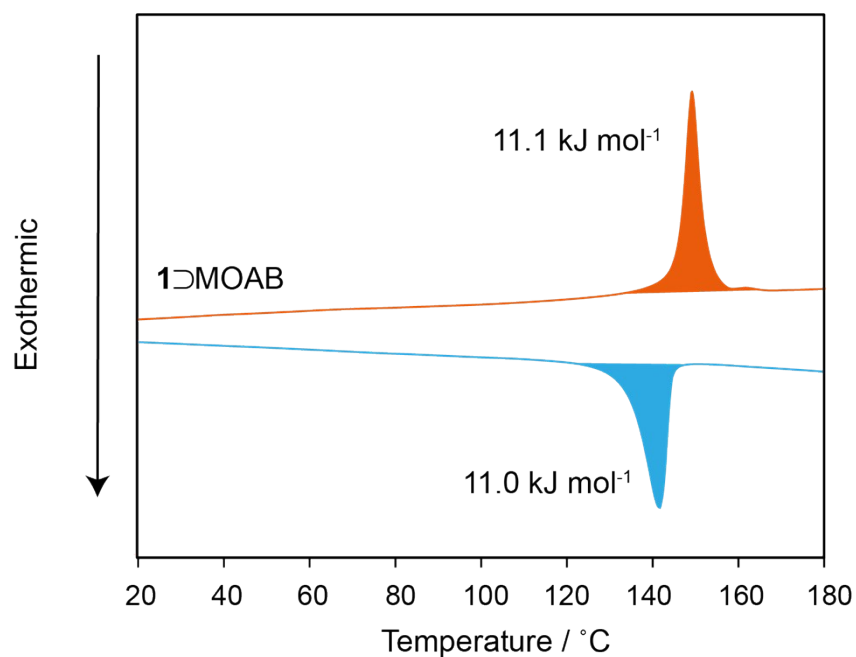

**Figure S19.** DSC thermogram of 1D-MOAB at a rate of 20 °C min<sup>-1</sup>.

**Table S8.** Thermal data for the first heating branch of 1D-MOAB between 0 – 180 °C at varying heating rates.

| Heating Rate / °C min <sup>-1</sup> | Energy density / J g <sup>-1</sup> | Endotherm onset / °C | Endotherm peak / °C | Peak Range / °C |
|-------------------------------------|------------------------------------|----------------------|---------------------|-----------------|
| 20                                  | 13.2                               | 145.4                | 149.0               | 38              |
| 15                                  | 13.1                               | 141.8                | 144.8               | 36              |
| 10                                  | 13.4                               | 141.9                | 144.4               | 22              |
| 5                                   | 13.2                               | 141.9                | 144.0               | 20              |
| 2.5                                 | 13.5                               | 142.0                | 143.6               | 20              |

**Table S9.** Thermal data for the first cooling branch of 1D-MOAB between 0 – 180 °C at varying cooling rates.

| Cooling Rate / °C min <sup>-1</sup> | Energy density / J g <sup>-1</sup> | Exotherm onset / °C | Exotherm peak / °C | Peak Range / °C |
|-------------------------------------|------------------------------------|---------------------|--------------------|-----------------|
| 20                                  | 12.7                               | 144.2               | 141.3              | 28              |
| 15                                  | 13.0                               | 141.1               | 138.7              | 35              |
| 10                                  | 12.2                               | 140.9               | 138.8              | 23              |
| 5                                   | 12.5                               | 140.7               | 139.2              | 24              |
| 2.5                                 | 12.4                               | 140.7               | 139.5              | 36              |

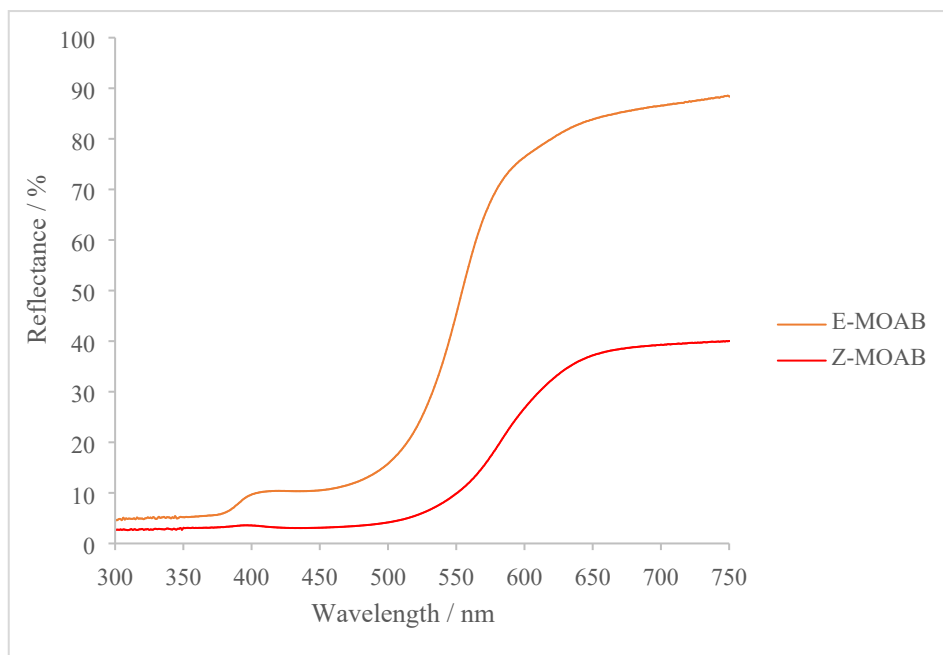

**Figure S20.** Solid-state UV-Vis diffuse reflectance spectra of *E*-MOAB and *Z*-MOAB.

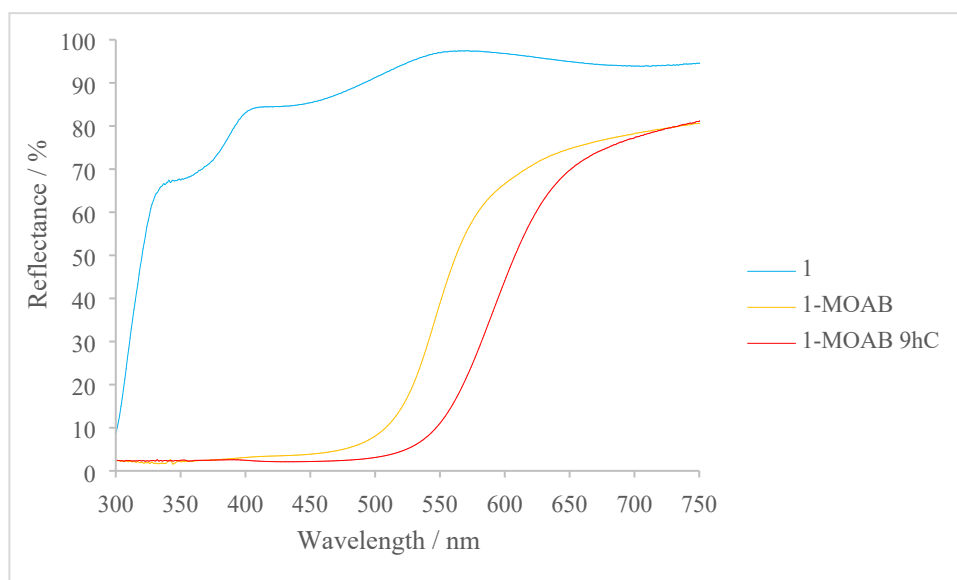

**Figure S21.** Solid-state UV-Vis diffuse reflectance spectra of **1**, **1**-MOAB and irradiated **1**-MOAB.

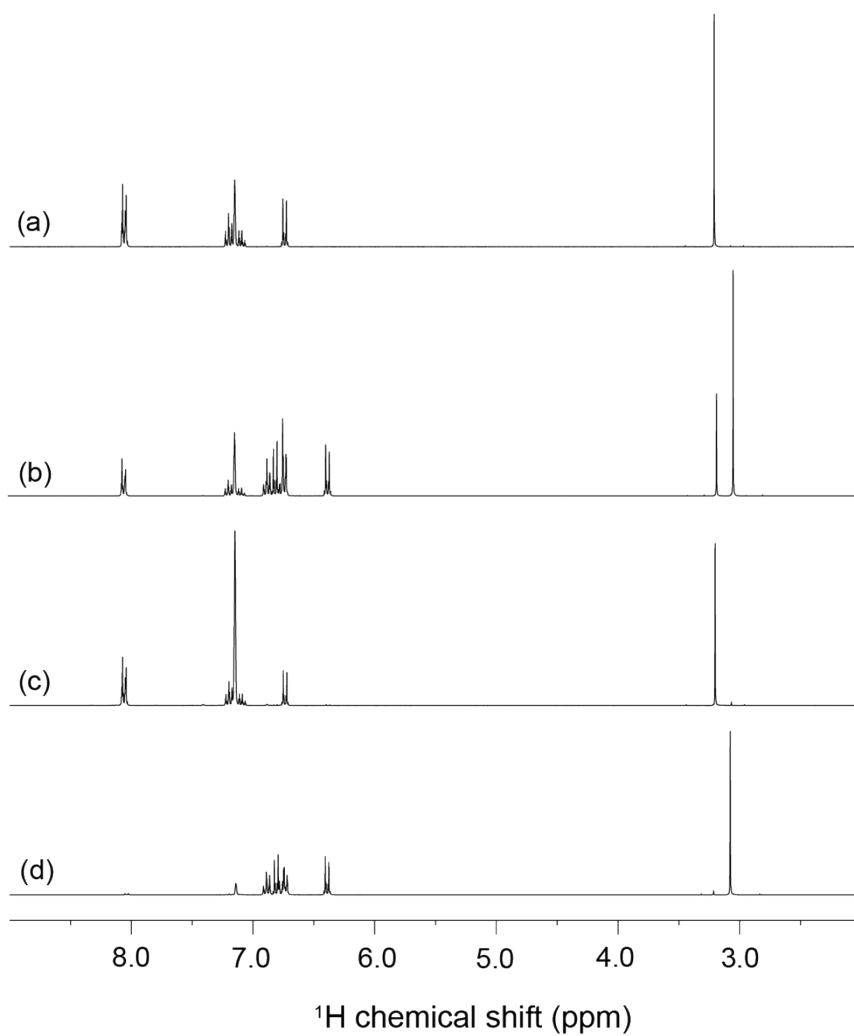

**Figure S22.**  $^1\text{H}$  NMR spectra of a) E-MOAB, b) irradiated MOAB (2h), c) MOAB redissolved from 1 $\rightarrow$ MOAB c) before and d) after 540 minutes of irradiation, in benzene- $d_6$ .

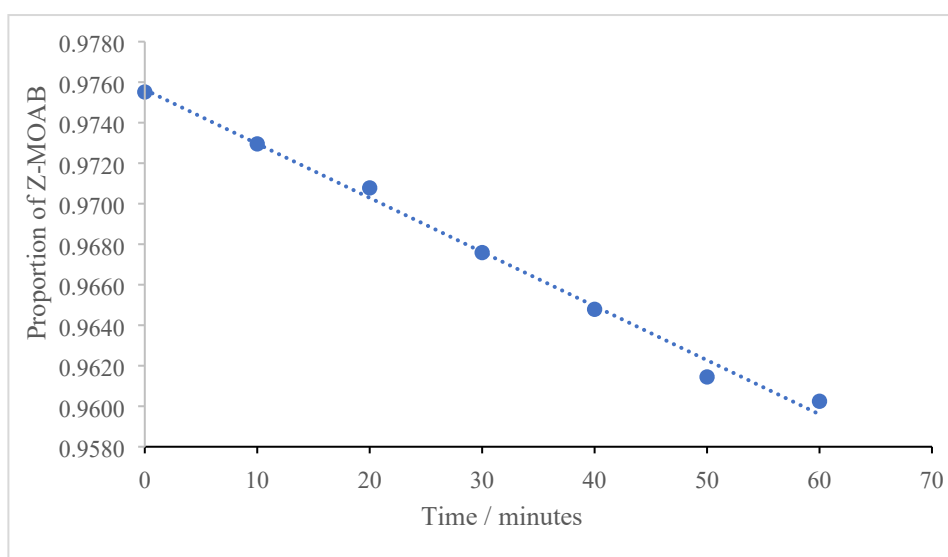

**Figure S23.** Plot of Z-MOAB population in benzene- $d_6$  as a function of time following irradiation at 365 nm.

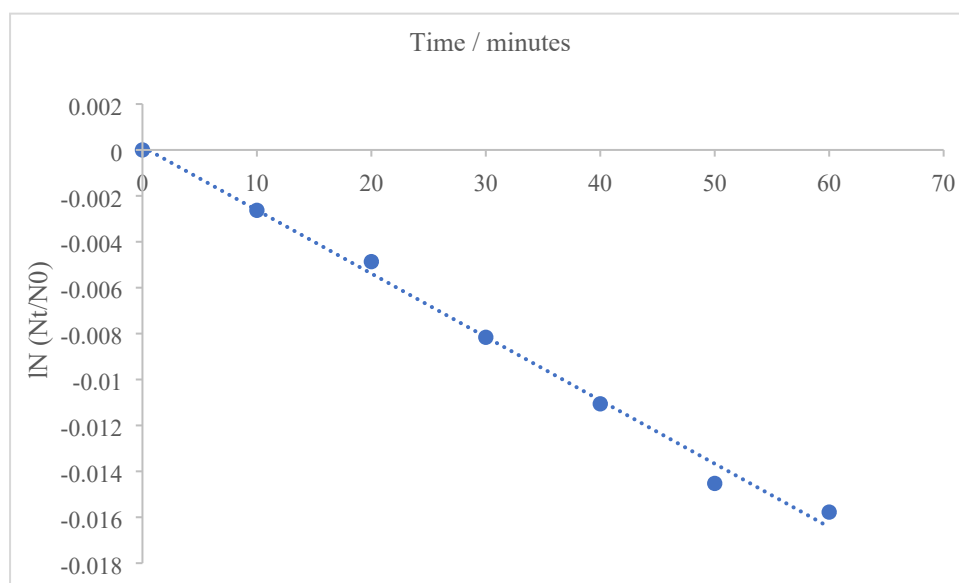

**Figure S24.** Plot showing  $\ln(N_t/N_0)$  as a function of time, where  $N_0$  is the population of Z-MOAB immediately after irradiation and  $N_t$  is the population of Z-MOAB at time  $t$ . Measurements were carried out in benzene- $d_6$  solution. The half-life of Z-MOAB in benzene solution was determined to be 38.5 hours.

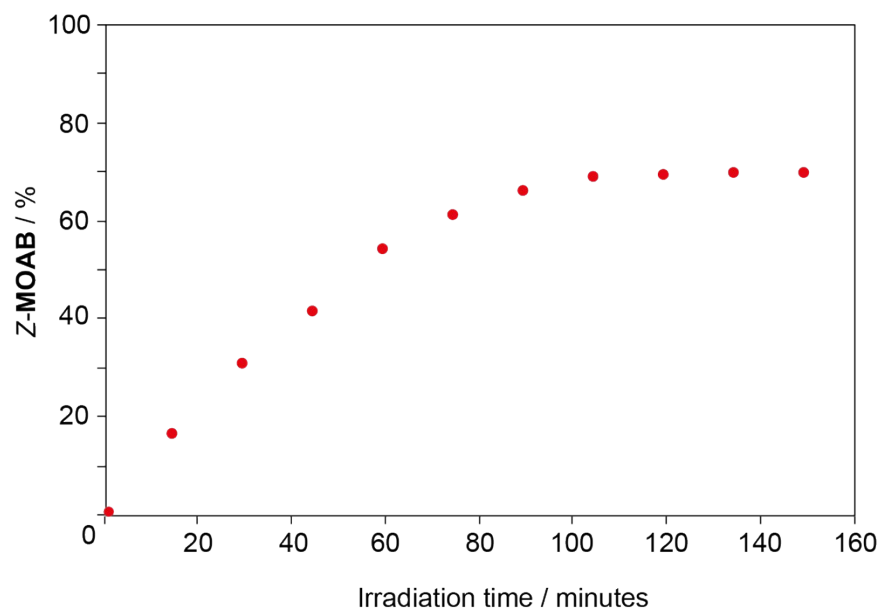

**Figure S25.** The increase in Z-MOAB proportion when MOAB irradiated in the crystalline state. A plateau is reached at 70% Z-MOAB.

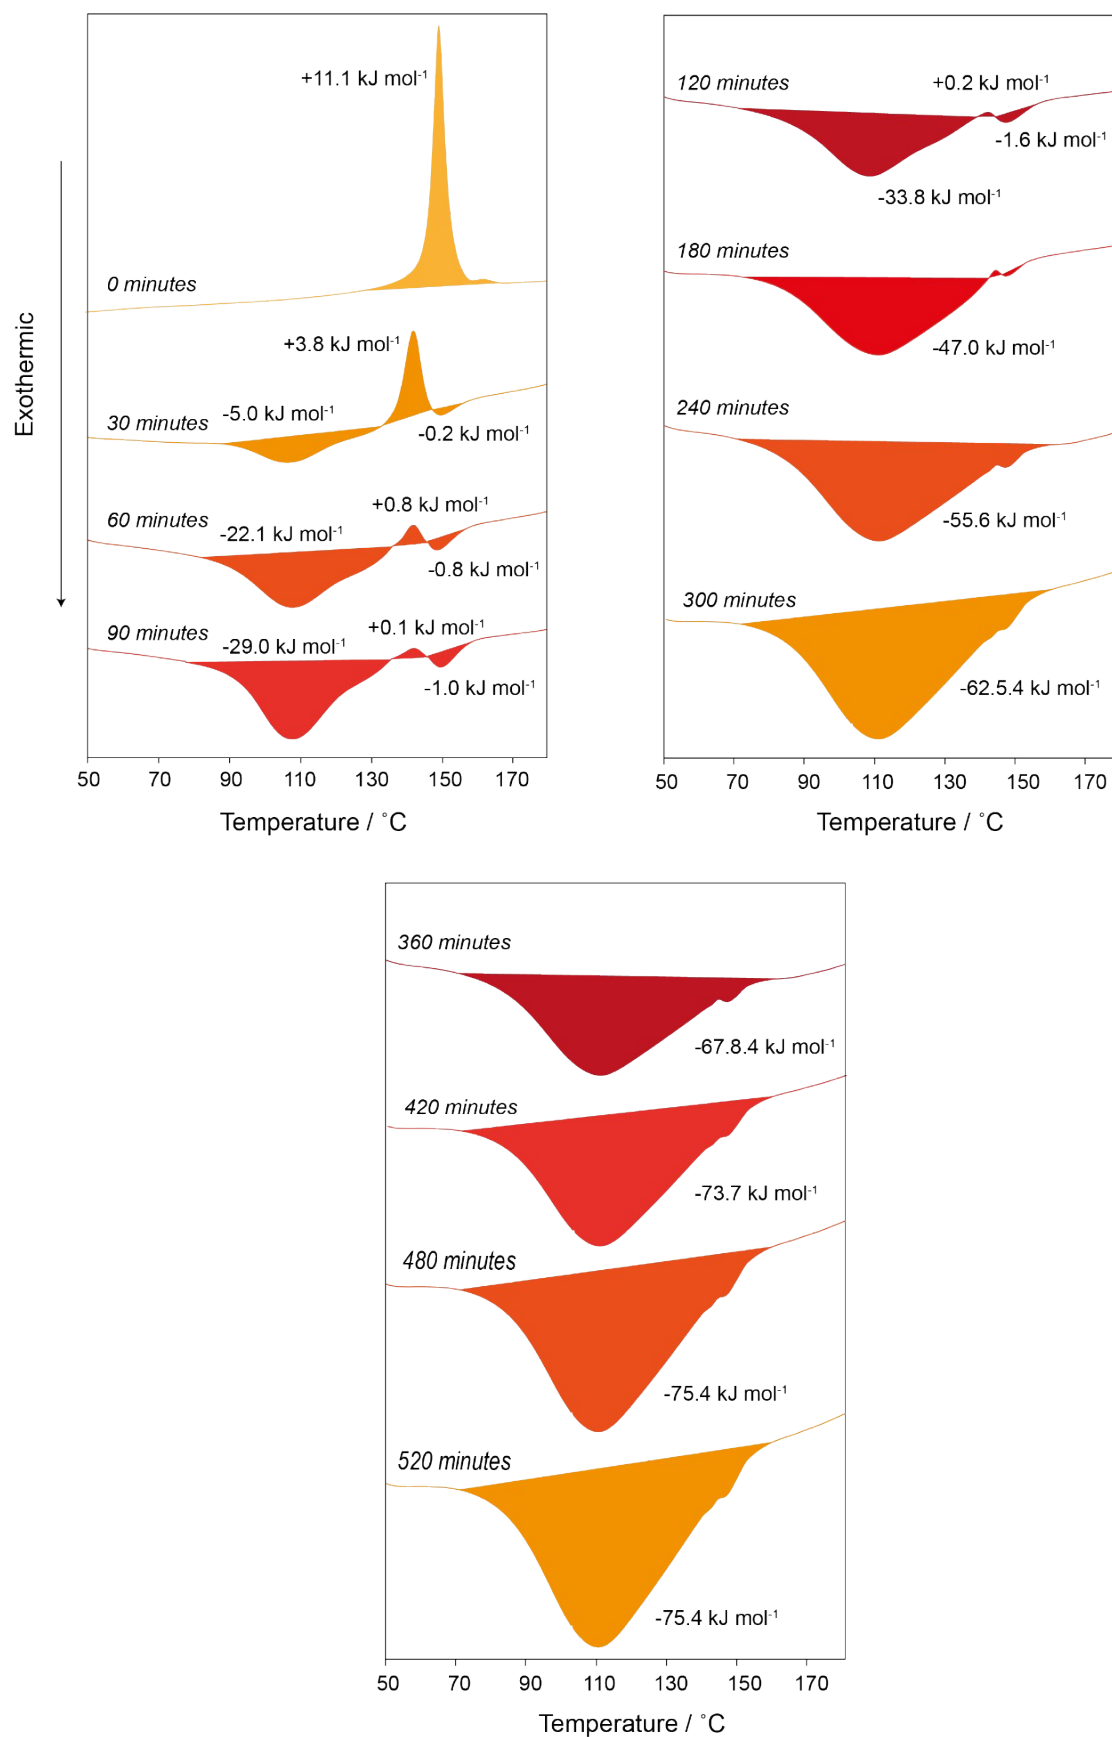

**Figure S26.** DSC thermograms of the first heating branch of 1 to MOAB with increasing irradiation time with a scan rate of 20 °C min<sup>-1</sup>.



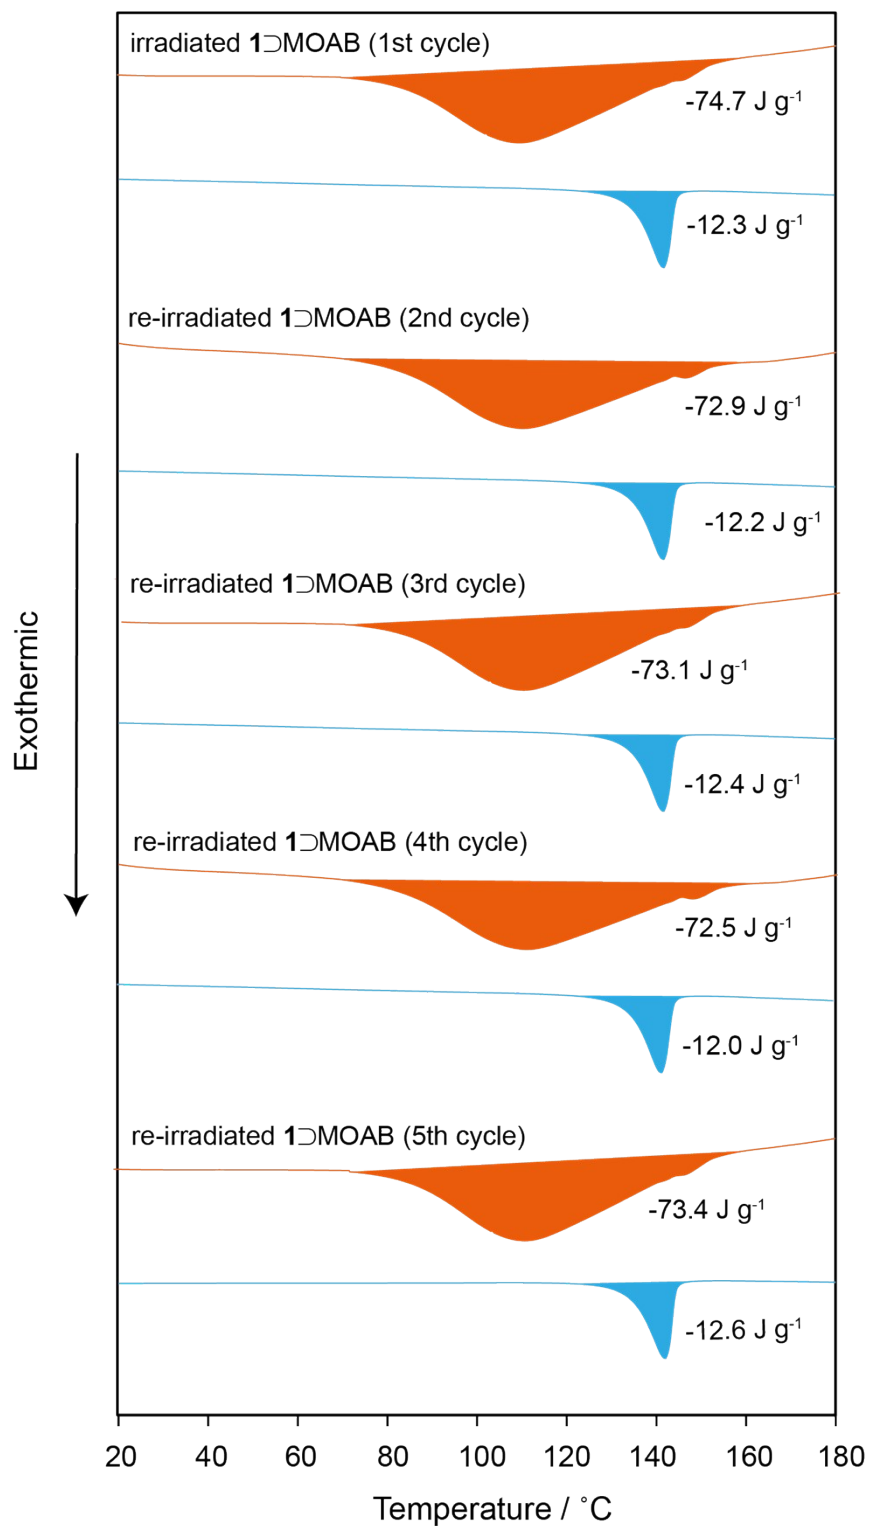

**Figure S27.** DSC cycling (irradiation/heat discharge) thermograms for 1D-MOAB. The material can be cycled up to five times without a loss in energy density.

**Table S10.** DFT calculated energy difference between *E*-MOAB and *Z*-MOAB were calculated using the CASTEP code where a single-molecule was confined in a 12 Å x 12 Å x 12 Å cell with fixed unit cell dimensions.

|                   | Energy / eV molecule <sup>-1</sup> | Energy / eV mol <sup>-1</sup> | Energy / J mol <sup>-1</sup> | Energy Density / J g <sup>-1</sup> |
|-------------------|------------------------------------|-------------------------------|------------------------------|------------------------------------|
| <i>E</i> -MOAB    | -3233.600200                       | -1.9473x10 <sup>27</sup>      | -311995649.90                | -1469944.17                        |
| <i>Z</i> -MOAB    | -3232.887900                       | -1.9469 x10 <sup>27</sup>     | -311926923.25                | -1469620.37                        |
| Energy Difference | -0.712300                          | -4.2896 x10 <sup>23</sup>     | -68726.65                    | -323.80                            |

**Table S11.** Fractional Mass of MOAB in **1**⊃MOAB.

| Sample         | RMM   | Fractional mass of MOAB |
|----------------|-------|-------------------------|
| <b>1</b>       | 579.3 |                         |
| <b>1</b> ⊃MOAB | 844.6 | 0.31                    |

**Table S12.** Thermal data for the first heating branch **1**⊃MOAB with varying lengths of irradiation.

| Time / | Exothermic (1) | Endothermic peak (1)/ J g <sup>-1</sup> | Exothermic peak (2)/ J g <sup>-1</sup> | Exothermic peak | Energy difference on heating |
|--------|----------------|-----------------------------------------|----------------------------------------|-----------------|------------------------------|
|--------|----------------|-----------------------------------------|----------------------------------------|-----------------|------------------------------|

| min | / J g <sup>-1</sup> |      |       | (3)/ J g <sup>-1</sup> | branch / J g <sup>-1</sup> |
|-----|---------------------|------|-------|------------------------|----------------------------|
| 0   | 0.0                 | 13.2 | 0     | -12.7                  | 0.5                        |
| 30  | -5.9                | 4.5  | 0     | -12.6                  | -14.1                      |
| 60  | -26.2               | 0.9  | -1.01 | -12.5                  | -38.8                      |
| 120 | -40.0               | 0.2  | -1.88 | -12.5                  | -54.2                      |
| 180 | -55.6               | 0.0  | -2.62 | -12.6                  | -70.8                      |
| 240 | -65.9               | 0.0  | 0     | -12.7                  | -78.6                      |
| 300 | -74.0               | 0.0  | 0     | -12.3                  | -86.3                      |
| 360 | -80.2               | 0.0  | 0     | -12.8                  | -93.0                      |
| 420 | -87.2               | 0.0  | 0     | -12.2                  | -99.4                      |
| 480 | -89.2               | 0.0  | 0     | -12.3                  | -101.5                     |
| 540 | -89.3               | 0.0  | 0     | -12.5                  | -101.8                     |

**Table S13.** Comparison for the experimental energy difference on the first heating branch and the calculated energy difference from *Z* to *E*-MOAB.

| Time / min | <i>Z</i> / % | Correction for PSS / J g <sup>-1</sup> | Calculated energy difference / J g <sup>-1</sup> | Difference between calculated and experimental / J g <sup>-1</sup> |
|------------|--------------|----------------------------------------|--------------------------------------------------|--------------------------------------------------------------------|
| 0          | 0            | 0.00                                   | 0.00                                             | 0.50                                                               |

|     |      |         |         |       |
|-----|------|---------|---------|-------|
| 30  | 0.13 | -42.30  | -13.29  | -0.76 |
| 60  | 0.38 | -123.64 | -38.84  | 0.02  |
| 120 | 0.53 | -172.45 | -54.17  | -0.06 |
| 180 | 0.69 | -224.50 | -70.53  | -0.30 |
| 240 | 0.77 | -250.53 | -78.70  | 0.14  |
| 300 | 0.85 | -276.56 | -86.88  | 0.56  |
| 360 | 0.91 | -296.09 | -93.01  | -0.02 |
| 420 | 0.95 | -309.10 | -97.10  | -2.33 |
| 480 | 0.99 | -322.12 | -101.19 | -0.34 |
| 540 | 0.99 | -322.12 | -101.19 | -0.64 |

---

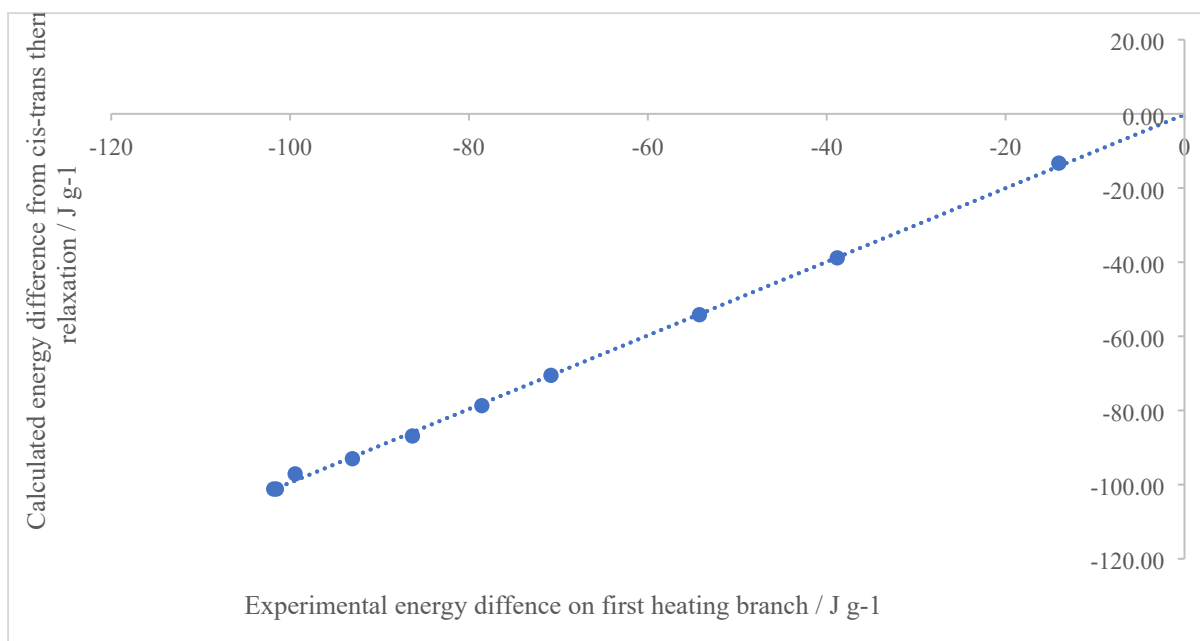

**Figure S28.** Relationship between the experimental energy difference on the first heating branch and the calculated energy difference due to *Z-E* thermal relaxation in 1-MOAB.

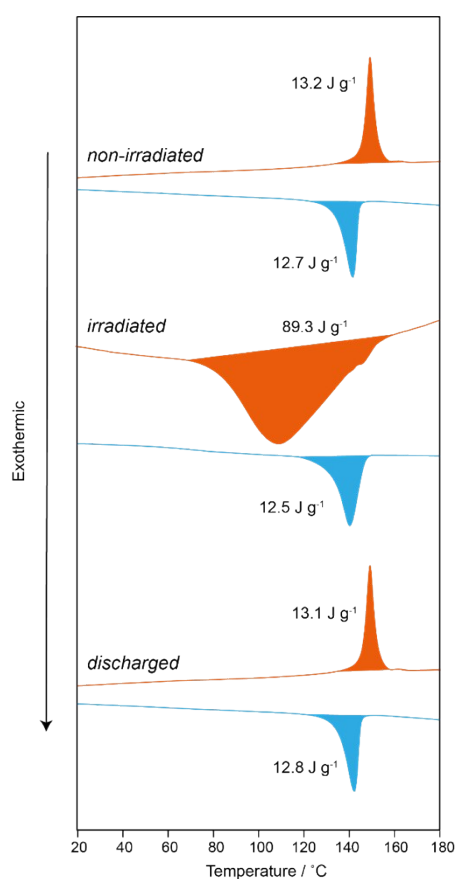

**Figure S29.** Successive DSC thermograms for (top) pristine 1-MOAB (middle) irradiated 1-MOAB and (bottom) thermally reverted 1-MOAB.

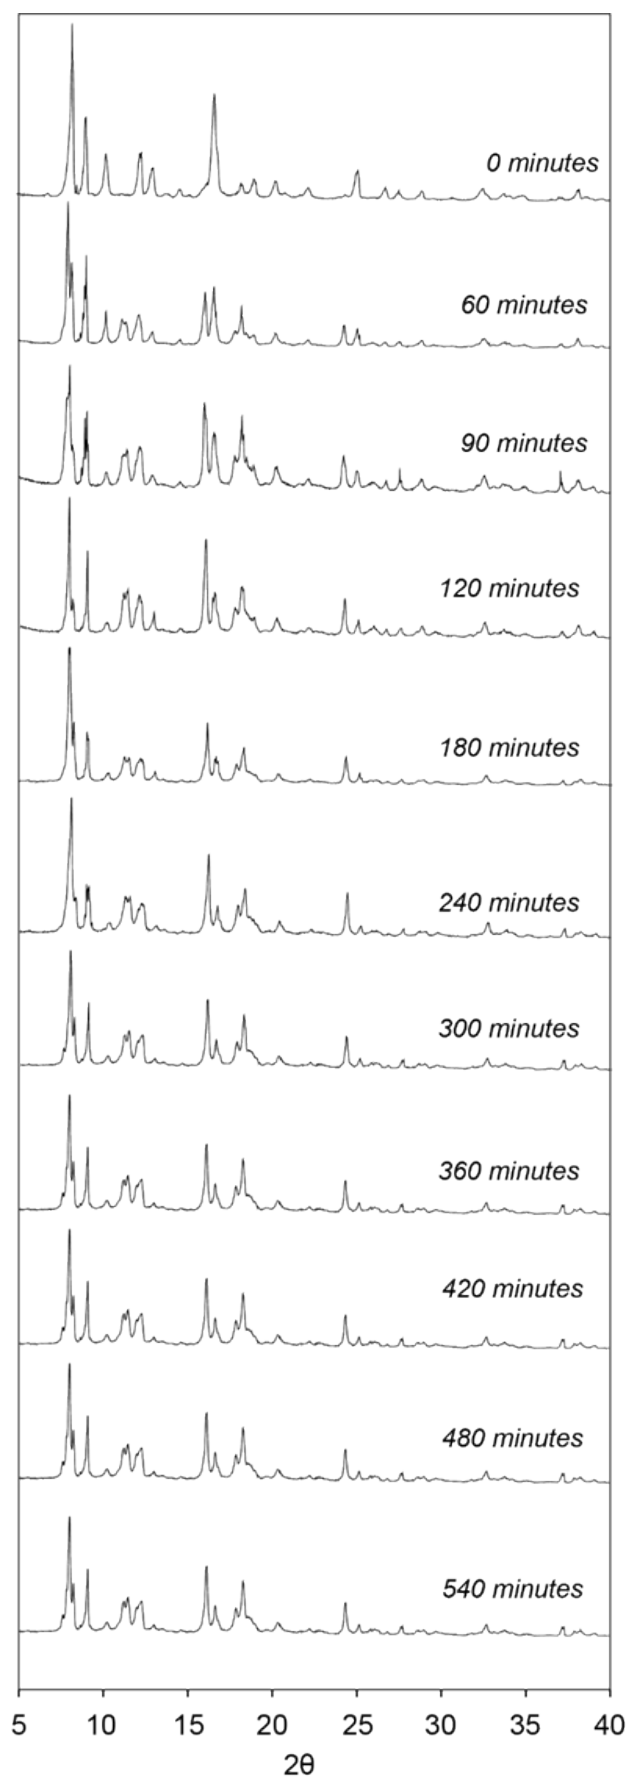

**Figure S30.** XRPD patterns of irradiated 1MOAB with specific times under 365 nm light.

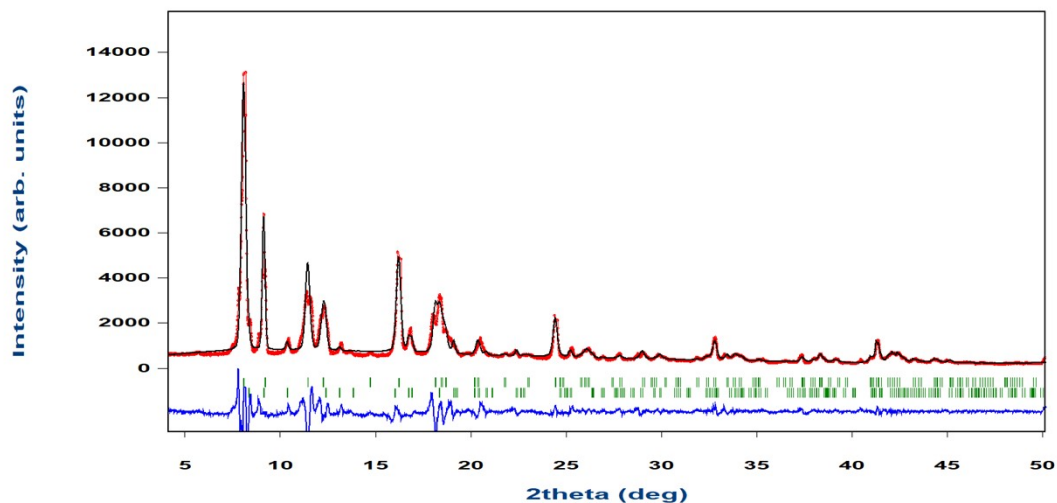

**Figure S31.** Le Bail fit of irradiated 1D-MOAB. Two phases were identified and the dominant phase's crystal system was found to be tetragonal. The lattice parameters were refined to be  $a = b = 10.982(7)$  Å,  $c = 9.619(3)$  Å,  $\alpha = \beta = \gamma = 90^\circ$ ,  $V = 1169.1(2)$  Å<sup>3</sup>. The space group was found to be  $P4/mmm$ . The second crystal system was found to be orthorhombic. The lattice parameters were refined to be  $a = 13.492(2)$  Å,  $b = 17.129(4)$ ,  $c = 9.679(8)$  Å,  $\alpha = \beta = \gamma = 90^\circ$ ,  $V = 2236.7(3)$  Å<sup>3</sup>. The space group was found to be  $Cmmm$ . Which is consistent with the pre-irradiated phase. General formula  $Zn_8C_{128}H_{120}N_{16}O_{32}$ . The reliability (R) factor based on the powder profile  $R_p$  was 11.19 %.

**Table S14.** DFT calculated energy differences between *E* and *Z* isomers of ortho fluorinated azobenzenes (AB-F<sub>x</sub>) which were reported to be occluded in MOFs.

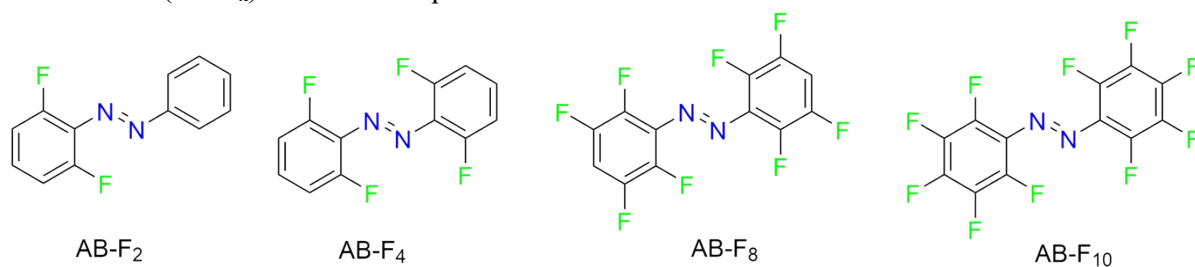

| AB-F <sub>2</sub> | (energy/molecule) /<br>(eV/molecule) | (energy/mole) /<br>(eV/mol) | (energy/mol) / (J/mol) | kJ / mol |
|-------------------|--------------------------------------|-----------------------------|------------------------|----------|
| <i>E</i> isomer   | -3894.29                             | -2.35E+27                   | -375743017.66          |          |
| <i>Z</i> -isomer  | -3893.92                             | -2.34E+27                   | -375707122.46          |          |
| ED                | -0.37                                | -2.24E+23                   | -35895.20              | -35.90   |

  

| AB-F <sub>4</sub> | (energy/molecule) /<br>(eV/molecule) | (energy/mole) /<br>(eV/mol) | (energy/mol) / (J/mol) | kJ / mol |
|-------------------|--------------------------------------|-----------------------------|------------------------|----------|
| <i>E</i> isomer   | -5184.86                             | -3.12E+27                   | -500264405.56          |          |
| <i>Z</i> -isomer  | -5184.63                             | -3.12E+27                   | -500242155.10          |          |
| ED                | -0.23                                | -1.39E+23                   | -22250.46              | -22.25   |

  

| AB-F <sub>8</sub> | (energy/molecule) /<br>(eV/molecule) | (energy/mole) /<br>(eV/mol) | (energy/mol) / (J/mol) | kJ / mol |
|-------------------|--------------------------------------|-----------------------------|------------------------|----------|
| <i>E</i> isomer   | -7765.80                             | -4.68E+27                   | -749287567.35          |          |
| <i>Z</i> -isomer  | -7765.48                             | -4.68E+27                   | -749256674.16          |          |
| ED                | -0.32                                | -1.93E+23                   | -30893.19              | -30.89   |

  

| AB-F <sub>10</sub> | (energy/molecule) /<br>(eV/molecule) | (energy/mole) /<br>(eV/mol) | (energy/mol) / (J/mol) | kJ / mol |
|--------------------|--------------------------------------|-----------------------------|------------------------|----------|
| <i>E</i> isomer    | -9055.96                             | -5.45E+27                   | -873769602.97          |          |
| <i>Z</i> -isomer   | -9055.59                             | -5.45E+27                   | -873733471.02          |          |
| ED                 | -0.37                                | -2.26E+23                   | -36131.96              | -36.13   |



**Table S15.** Calculated chemical shifts for a static molecule of Z-MOAB. The CASTEP code was used to geometry-optimize a single molecule within a unit cell with fixed dimensions of 12 x 12 x 12 Å before NMR parameters were calculated.

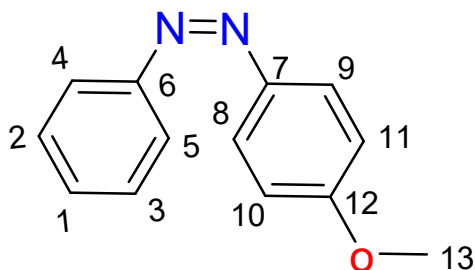

| C site | $\sigma_{\text{iso}}$ | Chemical shift / ppm |
|--------|-----------------------|----------------------|
| C1     | 44.6931               | 123.7669             |
| C2     | 42.7124               | 125.7476             |
| C3     | 40.1623               | 128.2977             |
| C4     | 57.6192               | 110.8408             |
| C5     | 44.2558               | 124.2042             |
| C6     | 11.1773               | 157.2827             |
| C7     | 21.865                | 146.595              |
| C8     | 36.3859               | 132.0741             |
| C9     | 53.4647               | 114.9953             |
| C10    | 62.2751               | 106.1849             |
| C11    | 55.6696               | 112.7904             |
| C12    | 7.8567                | 160.6033             |
| C13    | 117.8611              | 50.5989              |

**Table S16.** CASTEP-calculated chemical shifts for a dynamic molecule of Z-MOAB.

| C site  | $\sigma_{\text{iso}}$ | Chemical shift / ppm |
|---------|-----------------------|----------------------|
| C1      | 44.6931               | 123.7669             |
| C2/C3   | 41.43735              | 127.02265            |
| C4/C5   | 50.9375               | 117.5225             |
| C6      | 11.1773               | 157.2827             |
| C7      | 21.865                | 146.595              |
| C8/C9   | 44.9253               | 123.5347             |
| C10/C11 | 58.97235              | 109.48765            |
| C12     | 7.8567                | 160.6033             |
| C13     | 117.8611              | 50.5989              |

Fast rotational averaging was accounted for by averaging chemical shifts for carbons on opposite sides of the six-membered rings. This simulates the effect of fast rotation of the six-membered rings around the C-N bond. In terms of the predicted chemical shifts, this averaging is also equivalent to fast pedal motion dynamics of the central N=N linkage – indeed rotation of the rings and pedal motion of the N=N linkage cannot be distinguished by this method.

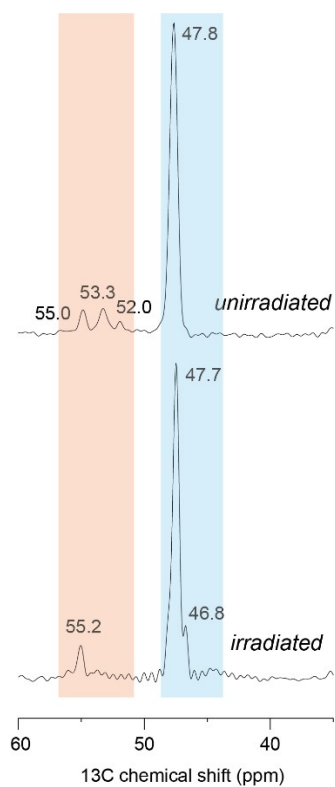

**Figure S32.** Comparison of the DABCO and methoxy regions of  $^{13}\text{C}$  CPMAS NMR spectra of  $1\text{D-MOAB}$  and irradiated  $1\text{D-MOAB}$ .

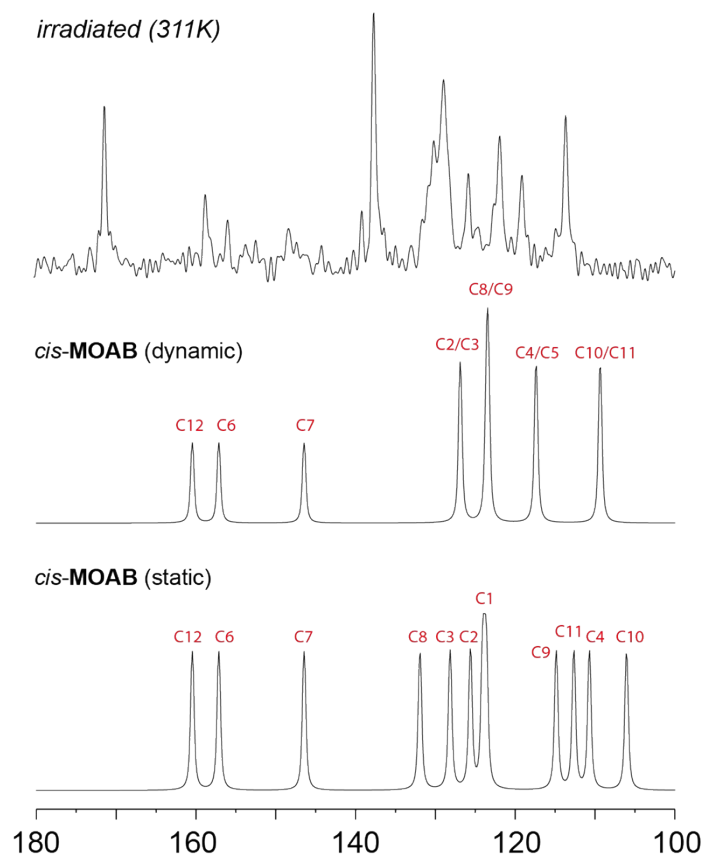

**Figure S33.** Comparison of the aromatic regions of  $^{13}\text{C}$  CPMAS NMR spectra of irradiated  $1\text{D-MOAB}$  to calculated chemical shifts for  $Z\text{-MOAB}$ .

**Table S17.** Population of Z-MOAB in 1 $\Rightarrow$ MOAB measured at different time intervals over a period of one month.

| hour   | day   | Fraction of Z-MOAB | Nt/N0 | Ln(Nt/N0) | 1/(Nt/N0) | 1/(Nt/N0) <sup>1.5</sup> | 1/(Nt/N0) <sup>2</sup> |
|--------|-------|--------------------|-------|-----------|-----------|--------------------------|------------------------|
| 0.00   | 0.00  | 0.98               | 1.00  | 0.00      | 1.00      | 1.00                     | 1.00                   |
| 1.00   | 0.04  | 0.97               | 0.99  | -0.01     | 1.01      | 1.02                     | 1.02                   |
| 2.00   | 0.08  | 0.97               | 0.99  | -0.01     | 1.01      | 1.02                     | 1.02                   |
| 3.00   | 0.13  | 0.96               | 0.98  | -0.02     | 1.02      | 1.03                     | 1.04                   |
| 4.00   | 0.17  | 0.96               | 0.98  | -0.02     | 1.02      | 1.03                     | 1.04                   |
| 5.00   | 0.21  | 0.95               | 0.97  | -0.03     | 1.03      | 1.05                     | 1.06                   |
| 6.00   | 0.25  | 0.94               | 0.96  | -0.04     | 1.04      | 1.06                     | 1.09                   |
| 7.00   | 0.29  | 0.94               | 0.96  | -0.04     | 1.04      | 1.06                     | 1.09                   |
| 8.00   | 0.33  | 0.93               | 0.95  | -0.05     | 1.05      | 1.08                     | 1.11                   |
| 24.00  | 1.00  | 0.85               | 0.87  | -0.14     | 1.15      | 1.23                     | 1.32                   |
| 26.00  | 1.08  | 0.84               | 0.86  | -0.15     | 1.16      | 1.25                     | 1.35                   |
| 28.00  | 1.17  | 0.83               | 0.85  | -0.16     | 1.18      | 1.28                     | 1.38                   |
| 30.00  | 1.25  | 0.82               | 0.84  | -0.17     | 1.19      | 1.30                     | 1.42                   |
| 46.00  | 1.92  | 0.75               | 0.77  | -0.26     | 1.30      | 1.48                     | 1.69                   |
| 48.00  | 2.00  | 0.75               | 0.76  | -0.27     | 1.32      | 1.51                     | 1.73                   |
| 50.00  | 2.08  | 0.74               | 0.75  | -0.29     | 1.33      | 1.54                     | 1.78                   |
| 68.00  | 2.83  | 0.68               | 0.69  | -0.37     | 1.45      | 1.74                     | 2.10                   |
| 69.00  | 2.88  | 0.67               | 0.69  | -0.37     | 1.45      | 1.74                     | 2.10                   |
| 70.00  | 2.92  | 0.67               | 0.68  | -0.39     | 1.47      | 1.78                     | 2.16                   |
| 71.00  | 2.96  | 0.67               | 0.68  | -0.39     | 1.47      | 1.78                     | 2.16                   |
| 144.00 | 6.00  | 0.50               | 0.51  | -0.67     | 1.96      | 2.75                     | 3.84                   |
| 216.00 | 9.00  | 0.41               | 0.42  | -0.87     | 2.38      | 3.67                     | 5.67                   |
| 288.00 | 12.00 | 0.36               | 0.37  | -0.99     | 2.70      | 4.44                     | 7.30                   |
| 360.00 | 15.00 | 0.32               | 0.33  | -1.11     | 3.03      | 5.28                     | 9.18                   |
| 432.00 | 18.00 | 0.29               | 0.30  | -1.20     | 3.33      | 6.09                     | 11.11                  |
| 504.00 | 21.00 | 0.27               | 0.28  | -1.27     | 3.57      | 6.75                     | 12.76                  |
| 576.00 | 24.00 | 0.26               | 0.26  | -1.35     | 3.85      | 7.54                     | 14.79                  |
| 648.00 | 27.00 | 0.24               | 0.25  | -1.39     | 4.00      | 8.00                     | 16.00                  |

**Figure S34.** Decay plots for the Z-MOAB isomer with respect to order of decay.

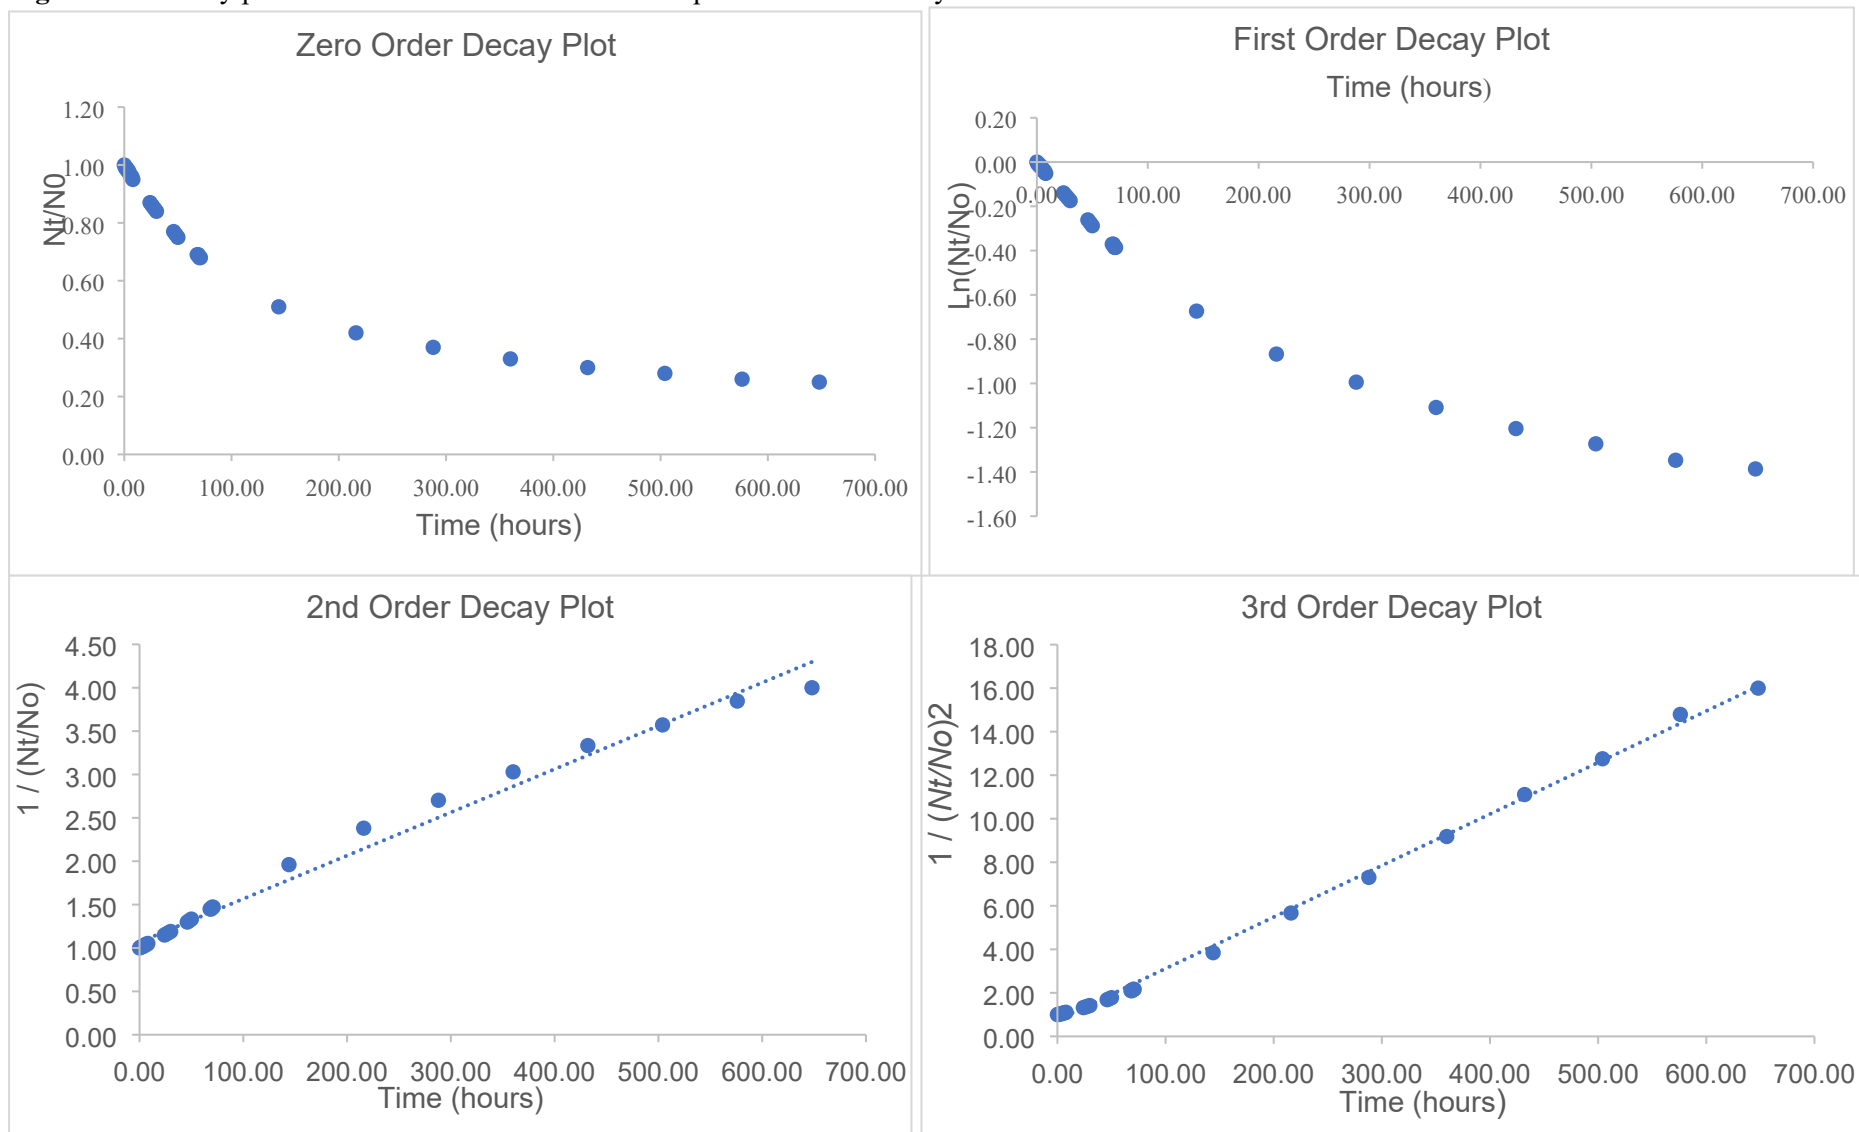

Supplement: d2sc00632d1.pdf [file d2sc00632d1.pdf]
